1 **A genome-wide CRISPR screen reveals a role for the BRD9-containing non-**  
2 **canonical BAF complex in regulatory T cells**

3

4 Chin-San Loo<sup>1,3,#</sup>, Jovylyn Gatchalian<sup>2,#</sup>, Yuqiong Liang<sup>1</sup>, Mathias Leblanc<sup>1</sup>, Mingjun  
5 Xie<sup>1</sup>, Josephine Ho<sup>2</sup>, Bhargav Venkatraghavan<sup>1</sup>, Diana C. Hargreaves<sup>2\*</sup>, and Ye  
6 Zheng<sup>1\*</sup>

7

8 1. NOMIS Center for Immunobiology and Microbial Pathogenesis, Salk Institute for  
9 Biological Studies

10 2. Molecular and Cellular Biology Laboratory, Salk Institute for Biological Studies

11 3. Division of Biological Sciences, University of California, San Diego

12 # Co-first authors

13 \* Co-corresponding authors

14

## 15 **Summary**

16 **Regulatory T cells (Tregs) play a pivotal role in suppressing auto-reactive T cells**  
17 **and maintaining immune homeostasis. Treg development and function are**  
18 **dependent on the transcription factor Foxp3. Here we performed a genome-wide**  
19 **CRISPR/Cas9 knockout screen to identify the regulators of Foxp3 in mouse**  
20 **primary Tregs. The results showed that Foxp3 regulators are highly enriched in**  
21 **genes encoding SWI/SNF and SAGA complex subunits. Among the three**  
22 **SWI/SNF-related complexes, the non-canonical or ncBAF (also called GBAF or**  
23 **BRD9-containing BAF) complex promoted the expression of Foxp3, whereas the**  
24 **PBAF complex repressed its expression. Gene ablation of BRD9 led to**  
25 **compromised Treg function in inflammatory disease and tumor immunity.**  
26 **Functional genomics revealed that BRD9 is required for Foxp3 binding and**  
27 **expression of a subset of Foxp3 target genes. Thus, we provide an unbiased**  
28 **analysis of genes and networks regulating Foxp3, and reveal ncBAF complex as a**  
29 **novel target that could be exploited to manipulate Treg function.**

30

## 31 **Introduction**

32 **Regulatory T cells (Tregs) play a crucial role in maintaining immune system**  
33 **homeostasis by suppressing over-reactive immune responses(Josefowicz et al., 2012;**  
34 **Sakaguchi et al., 2008). Defects in Tregs lead to autoimmune disorders and**  
35 **immunopathology, while certain tumors are enriched with Tregs that suppress anti-**  
36 **tumor immune responses(Tanaka and Sakaguchi, 2017). Foxp3, a member of the**  
37 **Forkhead transcription factor family, is a critical regulator that orchestrates the**

38 molecular processes involved in Treg differentiation and function(Zheng and Rudensky,  
39 2007). Therefore, understanding the regulation of Foxp3 expression could reveal novel  
40 therapeutic targets to potentially change Treg numbers or alter their function. It has  
41 been established that the T cell receptor (TCR) and IL-2 signaling pathways play critical  
42 roles in Foxp3 induction(Chinen et al., 2016; Lee et al., 2012). TGF- $\beta$  signaling is also  
43 essential for Foxp3 induction in periphery-derived Tregs and in vitro induced Tregs,  
44 although its role in thymus-derived Treg development is still under debate (Chen et al.,  
45 2003; Liu et al., 2008; Ouyang et al., 2010). Accordingly, a number of downstream  
46 transcription factors have been identified that regulate Foxp3 induction in vitro or in vivo,  
47 including STAT5a/b, CBF- $\beta$ /RUNX1/3, NFAT1, SMAD3/4, cRel, and CREB (Burchill et  
48 al., 2007; Kim and Leonard, 2007; Kitoh et al., 2009; Long et al., 2009; Rudra et al.,  
49 2009; Tone et al., 2008; Yang et al., 2008). Compared to the large number of studies  
50 focused on the mechanism of Foxp3 induction, relatively less is known about the factors  
51 that maintain Foxp3 expression in mature Treg cells. An intronic enhancer in *Foxp3*  
52 named CNS2 (conserved non-coding sequence 2), also known as TSDR (Treg-specific  
53 demethylated region), is a key cis-regulatory element required for stable Foxp3  
54 expression(Polansky et al., 2008; Zheng et al., 2010). CNS2 is heavily methylated in  
55 naive and activated conventional T cells by DNA methyl-transferase 1 (DNMT1), and  
56 deletion of Dnmt1 leads to aberrant expression of Foxp3 in conventional T  
57 cells(Josefowicz et al., 2009). Once Foxp3 expression is induced during Treg  
58 development, the CNS2 region is rapidly demethylated, opening it up for the binding of  
59 transcription factors(Polansky et al., 2008). Foxp3 can bind to CNS2, as well as an

60 additional upstream enhancer named CNS0(Kitagawa et al., 2017), and stabilize its own  
61 expression in a positive feedback loop(Feng et al., 2014; Li et al., 2014b).

62

63 Post-translational modifications (PTM) of the Foxp3 protein, including phosphorylation,  
64 acetylation, and ubiquitination, are also a crucial part of the regulatory circuit that  
65 controls Foxp3 function and stability (van Loosdregt and Coffey, 2014). Among the  
66 regulators of Foxp3 PTMs, a pair of enzymes, ubiquitin ligase STUB1 and ubiquitin  
67 hydrolase USP7, were reported to promote or inhibit degradation of Foxp3 via  
68 ubiquitination, respectively (Chen et al., 2013; van Loosdregt et al., 2013). Finally,  
69 intracellular metabolism, and specifically the metabolic regulator mTOR (mammalian  
70 target of Rapamycin), has emerged as a key regulator of Foxp3 expression and Treg  
71 function. Early studies showed that weakened mTOR signaling leads to increased  
72 Foxp3 expression in iTregs in vitro (Delgoffe et al., 2009). However, recent studies  
73 using genetic models showed that complete ablation of mTOR in Tregs leads to  
74 compromised homeostasis and function of effector Tregs (Chapman et al., 2018; Sun et  
75 al., 2018). Despite these and other significant advances in understanding the molecular  
76 mechanisms regulating Foxp3, we lack a comprehensive picture of the regulatory  
77 networks that control Foxp3 expression.

78

79 In this study, we performed a genome-wide CRISPR/Cas9 knockout screen to identify  
80 the regulators of Foxp3 in mouse primary natural Treg cells. The screen results not only  
81 confirmed a number of known Foxp3 regulators but also revealed many novel factors  
82 that control Foxp3 expression. Gene ontology analysis showed that Foxp3 regulators

83 are highly enriched in genes encoding subunits of the SAGA and SWI/SNF complexes,  
84 which we further validated by single gRNA knockout and flow cytometry analysis. The  
85 mammalian SWI/SNF complex is a multi-subunit complex with a core ATPase protein,  
86 either SMARCA4 (BRG1) or SMARCA2 (BRM), that uses energy derived from ATP  
87 hydrolysis to remodel nucleosomes on chromatin. Mouse genetic studies have  
88 demonstrated that conditional knockout of *Smarca4* leads to impaired differentiation of T  
89 lymphocytes (Gebuhr et al., 2003; Zhao et al., 1998). In addition, a previous report  
90 demonstrated that genetic deletion of *Smarca4* in Tregs using the Foxp3-Cre driver  
91 results in the development of a fatal inflammatory disorder reminiscent of Foxp3 mutant  
92 *scurfy* mice (Chaiyachati et al., 2013). The authors showed that while Treg development  
93 and Foxp3 expression was normal in *Smarca4* deficient Tregs, Treg function was  
94 nevertheless compromised due to impaired activation of TCR target genes, for example  
95 chemokine receptor genes in Tregs. This is consistent with the rapid association of  
96 SMARCA4-containing SWI/SNF complexes with chromatin following TCR activation in T  
97 cells (Zhao et al., 1998).

98

99 Biochemical studies have demonstrated that SMARCA4 is associated with both the  
100 canonical BAF complex (BAF) and Polybromo1-associated BAF complex (PBAF) (Xue  
101 et al., 2000; Yan et al., 2005). In addition, recent studies in embryonic stem cells  
102 (ESCs)(Gatchalian et al., 2018) and cancer cell lines (Alpsoy and Dykhuizen, 2018;  
103 Michel et al., 2018; Wang et al., 2019) have identified a BRD9-containing non-canonical  
104 complex or ncBAF complex (also referred to as GBAF or BRD9-containing BAF), which  
105 contains several shared subunits including SMARCA4, but is distinct from the BAF and

106 PBAF complexes. Apart from uniquely incorporating BRD9, the ncBAF complex also  
107 contains GLTSCR1 or the paralog GLTSCR1L and lacks BAF- and PBAF-specific  
108 subunits ARID1A, ARID1B, ARID2, SMARCE1, SMARCB1, SMARCD2, SMARCD3,  
109 DPF1-3, PBRM1, BRD7, and PHF10. The distinct biochemical compositions of these  
110 three SWI/SNF complex assemblies suggest functional diversity. However, it is not  
111 known which SWI/SNF complex assemblies are expressed in Tregs and the potential  
112 roles of specific SWI/SNF variants in regulating Foxp3 expression and Treg  
113 development have not been studied in depth.

114  
115 Here, we find that the BRD9-containing ncBAF complex promotes the expression of  
116 Foxp3, whereas the PBAF complex represses its expression. Furthermore, deletion of  
117 *Brd9* or PBAF component *Pbrm1* in Tregs results in reduced or enhanced suppressor  
118 activity, respectively, suggesting divergent regulatory roles of ncBAF and PBAF  
119 complexes in controlling Foxp3 expression and Treg function. Consistent with this  
120 model, we find that chemically-induced degradation of BRD9 by dBRD9 leads to  
121 reduced Foxp3 expression and compromised Treg function. Genome-wide binding  
122 studies revealed that BRD9 co-localizes with Foxp3, including at the CNS0 and CNS2  
123 enhancers at the *Foxp3* locus. Furthermore, targeting BRD9 by sgRNA or dBRD9  
124 reduces Foxp3 binding at the *Foxp3* locus and a subset of Foxp3 binding sites genome-  
125 wide, which results in differential expression of many Foxp3-dependent genes,  
126 indicating that BRD9 participates in the regulation of the Foxp3-dependent  
127 transcriptional program. Finally, we show that deletion of *Brd9* in Tregs reduced  
128 suppressor activity in an in vivo model of T cell transfer induced colitis, and improved

129 anti-tumor immune responses in an MC38 colorectal cancer cell induced cancer model.  
130 In summary, we perform an unbiased genome-wide screen to identify genes and  
131 networks regulating Foxp3, and reveal ncBAF complex as a novel target that could be  
132 exploited to manipulate Treg function in vitro and in vivo.

133

## 134 **Results**

### 135 **Genome-wide CRISPR screen in natural regulatory T cells identifies regulators of** 136 **Foxp3**

137 To screen for genes that regulate Foxp3 expression, we developed a pooled retroviral  
138 CRISPR sgRNA library by subcloning an optimized mouse genome-wide lentiviral  
139 CRISPR sgRNA library (lentiCRISPRv2-Brie) (Doench et al., 2016) into a newly  
140 engineered retroviral vector pSIRG-NGFR, which allowed us to efficiently transduce  
141 mouse primary T cells and to perform intracellular staining for Foxp3 without losing the  
142 transduction marker NGFR after cell permeabilization (Figure S1). Using this library, we  
143 performed CRISPR knockout screens on Tregs to identify genes that regulate Foxp3  
144 expression. We activated CD4<sup>+</sup>Foxp3<sup>+</sup> Tregs isolated from Rosa-Cas9/Foxp3<sup>Thy1.1</sup>  
145 knock-in mice (Liston et al., 2008; Platt et al., 2014) with CD3 and CD28 antibodies and  
146 IL-2 (Figure 1A). Treg cells were transduced 24 hours post-activation with the pooled  
147 retroviral sgRNA library at multiplicity of infection of less than 0.2 to ensure only one  
148 sgRNA was transduced per cell. NGFR<sup>+</sup> transduced Treg cells were collected on day 3  
149 and day 6 to identify genes that are essential for cell proliferation and survival. In  
150 addition, the bottom quintile (NGFR<sup>+</sup>Foxp3<sup>Low</sup>) and top quintile (NGFR<sup>+</sup>Foxp3<sup>High</sup>)  
151 populations were collected on day 6 to identify genes that regulate Foxp3 expression.

152 We validated the screen conditions by transducing Tregs with sgRNAs targeting *Foxp3*  
153 itself, as well as previously reported positive (*Cbfb*) (Rudra et al., 2009) and negative  
154 (*Dnmt1*) (Lal et al., 2009) regulators of *Foxp3* (Figure 1B-D). Guide RNA sequences  
155 integrated within the genomic DNA of sorted cells were recovered by PCR amplification,  
156 constructed into amplicon libraries, and sequenced with a NextSeq sequencer.  
157  
158 The relative enrichment of sgRNAs between samples and hit identification were  
159 computed by MAGeCK, which generates a normalized sgRNA read count table for each  
160 sample, calculates the fold change of sgRNA read counts between two cell populations,  
161 and further aggregates information of four sgRNAs targeting each gene to generate a  
162 ranked gene list (Li et al., 2014a). Prior to hit calling, we evaluated the quality of screen  
163 samples by measuring the percentage of mapped reads to the sgRNA library and total  
164 read coverage, which showed a high mapping rate (79.8-83.4%) with an average of  
165 236X coverage and a low number of missing sgRNAs (0.625-2.5%) (Figure S2). With  
166 the cutoff criteria of log<sub>2</sub> fold change (LFC)  $>\pm 0.5$  and p-value less than 0.01, we  
167 identified 254 potential positive *Foxp3* regulators enriched in the *Foxp3*<sup>Low</sup> population  
168 and 490 potential negative *Foxp3* regulators enriched in the *Foxp3*<sup>High</sup> population  
169 (Figure 2A, 2B, and Table S1). In a parallel analysis, we also identified 22 and 1497  
170 genes that affect cell expansion and contraction, respectively (p-value < 0.002, LFC > 1,  
171 Figure S3 and Table S2). As expected, we identified genes belonging to pathways  
172 known to regulate *Foxp3* expression both transcriptionally (*Cbfb*, *Runx3*) (Rudra et al.,  
173 2009) and post-transcriptionally through the regulation of *Foxp3* protein stability (*Usp7*,  
174 *Stub1*) (Chen et al., 2013; van Loosdregt et al., 2013) (Figure 2C).



175

176 We next compared the potential positive and negative regulators with genes involved in  
177 cell contraction and expansion to exclude hits that might affect Foxp3 expression  
178 indirectly by affecting cellular fitness in general, leaving 197 positive Foxp3 regulators  
179 and 327 negative Foxp3 regulators (Figure 2D and Table S3). Gene ontology analysis  
180 of positive Foxp3 regulators revealed a number of notable functional clusters including  
181 SAGA-type complex, negative regulation of T cell activation, RNA Polymerase II  
182 holoenzyme, positive regulation of histone modification, and SWI/SNF complex (Figure  
183 2E, Table S4). Among negative Foxp3 regulators, genes are highly enriched in clusters  
184 related to negative regulation of TOR signaling, transcriptional repressor complex,  
185 mRNA decay and metabolism, and hypusine synthesis from eIF5A-lysine (Figure 2F,  
186 Table S4). Several of these pathways, including mTOR signaling, Foxp3  
187 ubiquitination/deubiquitination, and transcriptional regulation, have been implicated in  
188 Foxp3 regulation previously, suggesting that our screen is robust for the validation of  
189 known pathways and the discovery of novel regulators of Foxp3. Among novel  
190 regulators, we identified many genes encoding subunits of the SAGA (*Ccdc101*, *Tada2b*,  
191 *Tada3*, *Usp22*, *Tada1*, *Taf6l*, *Supt5*, *Supt20*) and SWI/SNF (*Arid1a*, *Brd9*, *Smarcd1*)  
192 complexes (Table S4), strongly suggesting that these complexes could have  
193 indispensable roles for Foxp3 expression. We thus further validated and characterized  
194 the SAGA and SWI/SNF related complexes to understand their roles in Foxp3  
195 expression and Treg function.

196

197 **Validation of the SAGA complex as a novel regulator of Foxp3 expression and**  
198 **Treg suppressor activity**

199 The SAGA complex possesses histone acetyltransferase (HAT) and histone  
200 deubiquitinase (DUB) activity, and functions as a transcriptional co-activator through  
201 interactions with transcription factors and the general transcriptional  
202 machinery(Helmlinger and Tora, 2017; Koutelou et al., 2010). We identified *Ccdc101*,  
203 *Tada2b*, and *Tada3* in the HAT module, *Usp22* in the DUB module, and *Tada1*, *Taf6l*,  
204 *Supt5*, and *Supt20* from the core structural module among positive Foxp3 regulators  
205 that do not affect cell expansion or contraction (Figure S4A). We sought to validate the  
206 potential regulatory function of SAGA complex subunits by using sgRNAs to knock out  
207 individual subunits in Tregs and measure Foxp3 expression (Figure S4B, S4C). We  
208 found that deletion of every subunit tested resulted in a significant and 19-29%  
209 reduction in Foxp3 mean fluorescence intensity (MFI). We then further tested the  
210 function of SAGA subunit *Usp22* in an in vitro suppression assay, which measures the  
211 suppression of T cell proliferation when conventional T cells are co-cultured with Tregs  
212 at increasing ratios. We found that Tregs transduced with sgRNAs targeting *Usp22* had  
213 compromised Treg suppressor activity compared with Tregs transduced with a non-  
214 targeting control sgRNA, with significantly more proliferation of T effector cells (Teff) at  
215 every ratio of Treg to Teff ratio tested (Figure S4D). These results provide independent  
216 validation of our genome-wide screen analyses for this class of chromatin regulators  
217 and demonstrate that the SAGA complex is essential for normal Foxp3 expression and  
218 that disrupting the SAGA complex by sg*Usp22* reduces Treg suppressor function.  
219

220 **Identification of the BRD9-containing ncBAF complex as a specific regulator of**  
221 **Foxp3 expression**

222 We next wanted to characterize the role of SWI/SNF complex variants (BAF, ncBAF,  
223 and PBAF complexes) in Foxp3 expression. While these complexes share certain core  
224 subunits, such as the ATPase SMARCA4, each complex also contains specific subunits,  
225 for example the selective incorporation of the bromodomain containing protein BRD9 in  
226 ncBAF complexes (Figure 3A). Since the tissue-specific distribution and functional  
227 requirement for ncBAF complexes in primary T cells is not known, we performed co-  
228 immunoprecipitation assays to probe the composition of SWI/SNF-related complexes in  
229 Tregs. As expected, immunoprecipitation of SMARCA4, a core component of all three  
230 SWI/SNF complexes, revealed association of common subunits SMARCC1 and  
231 SMARCB1, as well as specific subunits ARID1A, BRD9, and PBRM1.  
232 Immunoprecipitations against ARID1A, BRD9, and PHF10 revealed the specific  
233 association of these subunits with BAF, ncBAF, and PBAF complexes, respectively  
234 (Figure 3A). These results established that all three SWI/SNF complexes are present  
235 with the expected composition in Tregs.

236

237 In our screen, we identified *Brd9*, *Smarcd1*, *Arid1a* and *Actl6a* among positive  
238 regulators of Foxp3, whereas SWI/SNF shared subunits *Smarca4*, *Smarcb1*, *Smarce1*,  
239 and *Actl6a* were identified in cell contraction (Table S3). This suggests a potential  
240 regulatory role for ncBAF and/or BAF complexes. To explore the specific function of  
241 BAF, ncBAF, and PBAF complexes in Foxp3 expression, we cloned independent  
242 sgRNAs to knockout unique subunits for each complex, and measured Foxp3 MFI in

243 sgRNA transduced Tregs. We observed an essential role for the ncBAF complex in  
244 Foxp3 expression in Tregs. Specifically, knockdown of ncBAF specific subunits,  
245 including *Brd9* and *Smarcd1*, significantly diminished Foxp3 expression by nearly 40%  
246 in Tregs (Figure 3B, 3C). Knockdown of ncBAF-specific paralogs *Gltscr1* and *Gltscr1l*  
247 individually resulted in a slight reduction in Foxp3 expression, which was further  
248 reduced in the *Gltscr1/Gltscr1l* double knockout, suggesting that these two paralogs can  
249 compensate in the regulation of Foxp3 expression (Figure 3C). In contrast, knockdown  
250 of PBAF specific subunits, including *Pbrm1*, *Arid2*, *Brd7*, and *Phf10*, significantly  
251 enhanced Foxp3 expression by as much as 17% (Figure 3C, green). Knockdown of  
252 BAF specific subunits *Arid1a*, *Arid1b*, *Dpf1*, or *Dpf2* did not significantly affect Foxp3  
253 expression (Figure 3C, blue). To determine if ARID1A and ARID1B could be  
254 compensating for one another, we performed *Arid1a/Arid1b* double deletion and found  
255 that deletion of either or both ARID paralogs resulted in slight, but non-significant  
256 reduction in Foxp3 MFI (Figure 3C, blue). These data suggest that ncBAF and PBAF  
257 have opposing roles in the regulation of Foxp3 expression. To further explore the role of  
258 different SWI/SNF complexes in Treg genome-wide transcription, we performed RNA  
259 sequencing from Tregs with knockdown of variant-specific subunits with one or two  
260 independent guide RNAs and conducted principal component analysis, which showed  
261 that the ncBAF, PBAF, and BAF also have distinct effects at whole transcriptome level  
262 in Tregs (Figure 3D).

263

264 We then made use of a recently developed chemical BRD9 protein degrader  
265 (dBRD9)(Remillard et al., 2017) as an orthogonal method to probe BRD9 function.

266 dBRD9 is a bifunctional molecule that links a small molecule that specifically binds to  
267 the bromodomain of BRD9 and another ligand that recruits the cereblon E3 ubiquitin  
268 ligase. We confirmed that treatment of Tregs with dBRD9 resulted in reduced BRD9  
269 protein levels (Figure S5A). Similar to sgRNA depletion of *Brd9*, dBRD9 treatment  
270 significantly decreased Foxp3 expression in Treg cells in a concentration-dependent  
271 manner, without affecting cell viability or proliferation (Figure 3E, Figure S5B). These  
272 data demonstrate the requirement for BRD9 in maintenance of Foxp3 expression using  
273 both genetic and chemically-induced proteolysis methods.

274

### 275 **BRD9 regulates Foxp3 binding at the CNS0 and CNS2 enhancers and a subset of** 276 **Foxp3 target sites**

277 To dissect the molecular mechanism of how ncBAF and PBAF complexes regulate  
278 Foxp3 expression in Treg cells, we performed chromatin immunoprecipitation followed  
279 by genome-wide sequencing (ChIP-seq) in Tregs using antibodies against the ncBAF-  
280 specific subunit BRD9, the PBAF-specific subunit PHF10 and the shared enzymatic  
281 subunit SMARCA4. Data generated from these ChIP-seq experiments revealed that  
282 BRD9, SMARCA4, and PHF10 co-localize at CNS2 in the *Foxp3* gene locus and at  
283 CNS0 found within the *Ppp1r3f* gene immediately upstream of *Foxp3* (Figure 4A). Since  
284 CNS2 was previously shown to regulate stable Foxp3 expression through a positive  
285 feedback loop involving Foxp3 binding (Feng et al., 2014; Li et al., 2014b), and Foxp3 is  
286 additionally bound at CNS0 in Tregs (Kitagawa et al., 2017), we rationalized that ncBAF  
287 and/or PBAF complexes might affect Foxp3 expression by regulating Foxp3 binding at  
288 CNS2/CNS0. We therefore performed Foxp3 ChIP-seq in Tregs transduced with sgNT,

289 sgFoxp3, sgBrd9 or sgPbrm1. We observed a dramatic reduction in Foxp3 binding at  
290 CNS2/CNS0 in sgFoxp3 transduced cells, as expected, and there was also marked  
291 reduction of Foxp3 binding at CNS2/CNS0 in *Brd9*-depleted Tregs (Figure 4A). In  
292 contrast, we observed a subtle increase in Foxp3 binding at CNS2/CNS0 in *Pbrm1*  
293 sgRNA transduced Tregs, which could explain why *Pbrm1* emerged as a negative  
294 regulator of Foxp3 expression in our validation studies (Figure 4A). These data suggest  
295 that BRD9 positively regulates Foxp3 expression by promoting Foxp3 binding to its own  
296 enhancers.

297

298 We then extended this analysis to examine the cooperation between BRD9 and Foxp3  
299 genome-wide. Notably, we find co-binding of BRD9, SMARCA4, and PHF10 with Foxp3  
300 at a subset of Foxp3-bound sites (Figure 4B, 4C). All four factors localize to promoters,  
301 intronic, and intergenic regions of the genome and their binding correlates well with  
302 chromatin accessibility as measured by assay of transposase-accessible chromatin with  
303 sequencing (ATAC-seq) (Figure 4B, S6A). Motif analysis of Foxp3-bound sites revealed  
304 an enrichment for motifs recognized by ETS and RUNX transcription factors consistent  
305 with what has been previously shown (Samstein et al., 2012). ETS and RUNX motifs  
306 were also among the most significant motifs at both BRD9-bound sites, along with an  
307 enrichment of the CTCF motif as we and others previously reported (Gatchalian et al.,  
308 2018; Michel et al., 2018) (Figure S6B). These results demonstrate that ncBAF and  
309 PBAF complexes are co-localized with Foxp3 at Foxp3 binding sites genome-wide.

310

311 To assess the requirement for BRD9 or PBRM1 in *Foxp3* targeting genome-wide, we  
312 analyzed *Foxp3* binding in Tregs transduced with sgNT, sg*Foxp3*, sgBrd9, or sgPbrm1  
313 at all *Foxp3* binding sites (Figure 4D). As expected, we find that *Foxp3* binding is lost at  
314 over 85% of its binding sites in sg*Foxp3*-transduced Treg cells (Figure 4E). *Foxp3*  
315 binding at a subset of these sites is also significantly reduced in sgBrd9-transduced  
316 Tregs (FC 1.5, Poisson  $p < 0.0001$ ), suggesting that BRD9 is required for *Foxp3* binding  
317 at a subset of its target sites (Figure 4E). This is a specific function of BRD9, as *Foxp3*  
318 binding does not change in *Pbrm1*-depleted Tregs at these BRD9-dependent sites  
319 (Figure 4F). ChIP-seq for the active histone mark H3 lysine27 acetylation (H3K27ac)  
320 revealed that BRD9 and *Foxp3* cooperate to maintain H3K27ac at over 1,800 shared  
321 sites (Figure 4G). At BRD9-dependent *Foxp3* sites, for example, we observed a  
322 reduction in H3K27ac in sg*Foxp3* and sgBrd9-transduced Tregs, but not in sgPbrm1-  
323 transduced Tregs (Figure 4H). Using dBRD9, we confirmed that BRD9 binding to  
324 chromatin is reduced (Figure S6C). We further recapitulated our observation that BRD9  
325 loss results in diminished *Foxp3* binding to chromatin at a subset of *Foxp3* target sites  
326 (Figure 4I, 4J, S6D), including at CNS2 and CNS0 (Figure 4A). These data demonstrate  
327 that BRD9 co-binds with *Foxp3* at the *Foxp3* locus to positively reinforce its expression.  
328 BRD9 additionally promotes *Foxp3* binding and H3K27ac levels at a subset of *Foxp3*  
329 target sites both by potentiating *Foxp3* expression and through direct epigenetic  
330 regulation at BRD9/*Foxp3* co-bound sites.

331

332 **BRD9 co-regulates the expression of *Foxp3* and a subset of *Foxp3* target genes**

333 Based on co-binding of BRD9 and Foxp3 at Foxp3 target sites, we assessed the effects  
334 of BRD9 ablation on the transcription of Foxp3 target genes. We performed RNA-seq in  
335 Tregs transduced with sgFoxp3, sgBrd9, or sgNT. Consistent with Foxp3's role as both  
336 transcriptional activator and repressor, we observed down-regulation and up-regulation  
337 of 793 and 532 genes, respectively, in *Foxp3* sgRNA transduced Tregs, which are  
338 enriched in 'cytokine production', 'regulation of defense response', and 'regulation of cell  
339 adhesion' (Figure 5A, 5B). Of these, 67% are directly bound by Foxp3 in our ChIP-seq  
340 dataset and 60% are co-bound by Foxp3 and BRD9 (Figure 5C). Deletion of BRD9  
341 resulted in transcriptional changes that strongly correlated with the transcriptional  
342 changes in sgFoxp3 transduced Tregs ( $r^2 = 0.534$ , Linear regression analysis; Figure  
343 5D). Indeed, gene set enrichment analysis (GSEA) demonstrated that the sgBrd9 up-  
344 regulated genes are significantly enriched among genes that increase upon Foxp3  
345 knockdown, while the sgBrd9 down-regulated genes are enriched among genes that  
346 decrease in sgFoxp3 Tregs (Figure 5E). We also performed RNA-seq for Tregs treated  
347 with either vehicle or the dBRD9 degrader and observed a similar significant enrichment  
348 for dBRD9 affected genes among the Foxp3 up- and down-regulated genes (Figure 5F).  
349 Notably, the BRD9-dependent target gene sets generated from our RNA-seq data were  
350 among the most significantly enriched dataset of 9,229 immunological, gene ontology  
351 and curated gene sets when analyzed against the sgFoxp3 transduced Treg expression  
352 data (Figure 5G). In addition, both datasets were significantly enriched for genes that  
353 are differentially expressed between Tregs and conventional T cells (Feuerer et al.,  
354 2010), and between Foxp3 mutant Tregs from *scurfy* mice and wild-type Tregs (Hill et al.,



355 2007). These data define a role for BRD9 in Tregs through specifically regulating the  
356 expression of Foxp3 itself and a subset of Foxp3 target genes.

357

358 **ncBAF complex is required for normal Treg suppressor activity in vitro and in**  
359 **vivo.**

360 The divergent roles of ncBAF and PBAF complexes in regulating Foxp3 expression  
361 suggested that these complexes might also differentially affect Treg suppressor function.

362 We performed sgRNA knockdown of ncBAF-specific *Brd9* and *Smarcd1* or PBAF-  
363 specific *Pbrm1* and *Phf10* in Tregs and measured their function by conducting an *in*  
364 *vitro* suppression assay. Tregs depleted of *Brd9* or *Smarcd1* exhibited significantly

365 reduced suppressor function, whereas depletion of *Pbrm1* or *Phf10* resulted in  
366 significantly enhanced suppressor function (Figure 6A, S7A). These data demonstrate

367 that the opposing regulation of Foxp3 expression by ncBAF and PBAF complexes  
368 results in decreased/increased Treg suppressor activity upon ncBAF or PBAF subunit  
369 deletion, respectively. Similar to sgRNA depletion of *Brd9*, Tregs treated with dBRD9

370 also showed significantly and specifically compromised Treg suppressor function *in vitro*  
371 (Figure S7B). These results underscore the requirement for BRD9 in Foxp3 expression

372 maintenance and Treg suppressor activity, and further demonstrate that dBRD9  
373 reduces Treg suppressor activity without impairing T effector responses in vitro.

374

375 To test if BRD9 also affects Treg function *in vivo*, we utilized a T cell transfer-induced  
376 colitis model. In this model, *Rag1* knockout mice were either transferred with CD45.1<sup>+</sup>

377 CD4<sup>+</sup> CD25<sup>-</sup>CD45RB<sup>High</sup> effector T cell (Teff) only, or co-transferred with Teff along with

378 CD45.2<sup>+</sup> Tregs transduced with *Brd9* sgRNA (sgBrd9) or control sgRNA (sgNT) (Figure  
379 6B). Mice transferred with Teff cells alone lost body weight progressively due to  
380 development of colitis. Co-transfer of Tregs transduced with sgNT protected recipient  
381 mice from weight loss, whereas co-transfer of sgBrd9 transduced Tregs failed to protect  
382 recipients from losing weight (Figure 6C). The mice transferred with *Brd9*-depleted  
383 Tregs showed significant colitis pathology at seven weeks compared to mice that  
384 received control Tregs (Figure 6D). Furthermore, *Brd9* depletion also led to  
385 compromised Treg stability after transfer, manifested by reduced Foxp3<sup>+</sup> cell  
386 frequencies within the CD45.2<sup>+</sup>CD4<sup>+</sup> transferred Treg population (Figure 6E). These  
387 results demonstrate that BRD9 is an essential regulator of normal Foxp3 expression  
388 and Treg function in a model of inflammatory bowel disease *in vivo*.

389  
390 In addition to their beneficial role in preventing autoimmune diseases, Tregs have also  
391 been shown to be a barrier to anti-tumor immunity. We therefore wondered whether we  
392 could exploit the compromised suppressor function shown in *Brd9* deficient Tregs to  
393 disrupt Treg-mediated immune suppression in tumors. We used the MC38 colorectal  
394 tumor cell line to induce cancer due to the prominent role Tregs play in this cancer  
395 model(Delgoffe et al., 2013). *Rag1* knockout mice were used as recipients for adoptive  
396 transfer of Treg depleted-CD4 and CD8 T cells (Teff) only, or co-transfer of Teff with  
397 Tregs transduced with either sgBrd9 or control sgNT. MC38 tumor cells were implanted  
398 subcutaneously on the following day (Figure 7A). Transfer of sgNT Tregs allowed for  
399 significantly faster tumor growth compared to mice that received Teff cells only (“No  
400 Treg”) due to suppression of the anti-tumor immune response by Tregs (Figure 7B, 7C).

401 Furthermore, tumor growth in mice that received sgBrd9 transduced Tregs was  
402 significantly slower than mice that received sgNT Tregs consistent with our findings that  
403 Brd9 knockdown reduces Treg suppressor activity (Figure 7B, 7C). Both CD4 and CD8  
404 T cell tumor infiltration significantly increased in mice that received sgBrd9 transduced  
405 Tregs compared to sgNT Tregs (Figure 7D, 7E). Additionally, the percent of IFN- $\gamma$   
406 producing intra-tumor CD4 and CD8 T cells in mice that received sgBrd9 transduced  
407 Tregs was significantly greater than the sgNT Treg condition, and comparable to the  
408 transfer of Teff alone (“No Treg”) (Figure 7F, 7G). Consistent with our findings that  
409 BRD9 is required for Treg persistence in vivo (Figure 6E), the percentage of transferred  
410 Treg cells was reduced in mice that received sgBrd9 transduced Tregs relative to sgNT  
411 Tregs (Figure 7H). Overall, a 2-3 fold increase in the ratio of CD8 T cells to Tregs in  
412 tumor and spleen was observed in the sgBrd9 versus the sgNT condition, consistent  
413 with the enhanced anti-tumor immune response in mice that received sgBrd9  
414 transduced Tregs (Figure 7I). This experiment demonstrates that BRD9 promotes stable  
415 Treg function in MC38 tumors and knockdown of Brd9 in Tregs improves anti-tumor  
416 immunity in this context.

417

## 418 **Discussion**

419 In this study, we performed a genome-wide CRISPR screen to identify positive and  
420 negative regulators of Foxp3 expression in mouse natural Tregs. Among positive  
421 regulators, we identified *Cbfb* and *Runx3*, consistent with previous reports showing a  
422 requirement for CBF- $\beta$ /Runx3 in Foxp3 expression and Foxp3-dependent target gene  
423 expression (Kitoh et al., 2009; Rudra et al., 2009). Among the novel positive regulators,

424 we discovered subunits from two chromatin remodeling complexes, the BRD9-  
425 containing ncBAF and SAGA complexes. Independent validation and functional assays  
426 demonstrated an essential role for the ncBAF complex and SAGA complex in Foxp3  
427 expression and Treg suppressor function.

428  
429 Our screens also confirmed several known negative regulators of Foxp3, including DNA  
430 methyl-transferase *Dnmt1* and the ubiquitin ligase *Stub1*. Additionally, we identified  
431 multiple negative regulators of the mTOR pathway as Foxp3 negative regulators (*Tsc2*,  
432 *Fln*, *Ddit4*, *Sesn2*, *Nprl2*), confirming an essential role for mTOR in homeostasis and  
433 function of activated Tregs(Chapman et al., 2018; Sun et al., 2018). Among novel  
434 negative Foxp3 regulators, we uncovered genes encoding regulators of RNA  
435 metabolism, which have no previously reported function in Foxp3 expression. For  
436 example, *Mettl3* and *Mettl14* form a methyltransferase complex that is essential for the  
437 m<sup>6</sup>A methylation of RNA, which is recognized as an important regulatory mechanism for  
438 a wide range of biological processes, including RNA stability, protein translation, stem  
439 cell self-renewal, cell lineage determination, and oncogenesis(Yue et al., 2015). Our  
440 screen suggests a potentially novel role for RNA m<sup>6</sup>A methylation in post-transcriptional  
441 regulation of Foxp3. Together, our genome-wide screens provide the first  
442 comprehensive picture of the complex regulatory network controlling Foxp3 expression  
443 levels, and reveal previously unknown pathways and factors that warrant further  
444 investigation.

445

446 Following the identification of SWI/SNF subunit genes among Foxp3 regulators, we  
447 endeavored to characterize the roles of the three SWI/SNF-related complexes by  
448 deleting subunits unique to each of the ncBAF, BAF, and PBAF complexes. We  
449 observed specific and divergent roles of ncBAF and PBAF complexes in regulating  
450 Foxp3 expression in Tregs. In contrast, deletion of BAF-specific subunits had a slight,  
451 but non-significant effect on Foxp3 expression. Nevertheless, several SWI/SNF core  
452 subunits were recovered in our screen among genes that regulate Treg cell contraction,  
453 suggesting that BAF complexes may regulate Treg activation or proliferation in  
454 response to TCR stimulation used to activate and culture Tregs in our screen. This is  
455 consistent with a role for *Smarca4* in Treg activation and control of autoimmunity *in vivo*  
456 independent of affecting Foxp3 expression, which is not changed in Foxp3-  
457 Cre:*Smarca4*<sup>f/f</sup> Tregs(Chaiyachati et al., 2013). Thus, deletion of *Smarca4* or other BAF  
458 complex subunits likely results in overall defects in Treg fitness, whereas deletion of  
459 ncBAF subunits appears to have a selective effect on Foxp3 expression and its target  
460 genes. Mechanistically, we find that the ncBAF complex co-binds and cooperates with  
461 Foxp3 to potentiate its binding to the CNS2 and CNS0, enhancers of the *Foxp3* locus.  
462 In addition to the Foxp3 locus itself, our CHIP-seq analysis revealed that ncBAF also  
463 binds to regulatory elements in a subset of Foxp3 target genes to regulate their gene  
464 expression. One possibility is that reduced Foxp3 expression results in lowered Foxp3  
465 binding at a select group of target genes, but what differentiates the dosage-dependent  
466 binding of Foxp3 at these sites compared to other unaffected sites remains unclear.  
467

468 Finally, we tested the vivo relevance of our findings by disrupting the ncBAF subunit  
469 Brd9 in Tregs in mouse models of inflammatory bowel disease and cancer. Knockdown  
470 of *Brd9* in Tregs weakened their suppressor function in a model of T cell induced colitis,  
471 leading to exacerbated disease progression. In the context of cancer, we found that  
472 transfer of *Brd9* deficient Tregs failed to restrict anti-tumor immune responses in the  
473 MC38 cell induced cancer model, leading to slower tumor growth. Currently, there is a  
474 concerted effort to develop compounds targeting a number of SWI/SNF complex  
475 subunits to modulate their function. Our data show that bromodomain-directed  
476 degradation of BRD9 by dBRD9 recapitulates the effects of *Brd9* genetic deletion,  
477 suggesting that the ncBAF complex can be targeted with small molecules to control  
478 Foxp3 expression and Treg function. Thus, through the unbiased screen of Foxp3  
479 regulators, we have identified novel proteins that can potentially be targeted to  
480 manipulate Treg homeostasis and function in autoimmune diseases and cancer.  
481  
482

## 483 References

- 484 Alpsy, A., and Dykhuizen, E.C. (2018). Glioma tumor suppressor candidate region  
485 gene 1 (GLTSCR1) and its paralog GLTSCR1-like form SWI/SNF chromatin remodeling  
486 subcomplexes. *The Journal of biological chemistry* 293, 3892-3903.
- 487 Andrews, N.C., and Faller, D.V. (1991). A rapid micropreparation technique for  
488 extraction of DNA-binding proteins from limiting numbers of mammalian cells. *Nucleic*  
489 *Acids Res* 19, 2499.
- 490 Buenrostro, J.D., Giresi, P.G., Zaba, L.C., Chang, H.Y., and Greenleaf, W.J. (2013).  
491 Transposition of native chromatin for fast and sensitive epigenomic profiling of open  
492 chromatin, DNA-binding proteins and nucleosome position. *Nat Methods* 10, 1213-1218.
- 493 Burchill, M.A., Yang, J., Vogtenhuber, C., Blazar, B.R., and Farrar, M.A. (2007). IL-2  
494 receptor beta-dependent STAT5 activation is required for the development of Foxp3+  
495 regulatory T cells. *Journal of immunology* 178, 280-290.
- 496 Chaiyachati, B.H., Jani, A., Wan, Y., Huang, H., Flavell, R., and Chi, T. (2013). BRG1-  
497 mediated immune tolerance: facilitation of Treg activation and partial independence of  
498 chromatin remodelling. *EMBO J* 32, 395-408.
- 499 Chapman, N.M., Zeng, H., Nguyen, T.M., Wang, Y., Vogel, P., Dhungana, Y., Liu, X.,  
500 Neale, G., Locasale, J.W., and Chi, H. (2018). mTOR coordinates transcriptional  
501 programs and mitochondrial metabolism of activated Treg subsets to protect tissue  
502 homeostasis. *Nature communications* 9, 2095.
- 503 Chen, W., Jin, W., Hardegen, N., Lei, K.J., Li, L., Marinos, N., McGrady, G., and Wahl,  
504 S.M. (2003). Conversion of peripheral CD4+CD25- naive T cells to CD4+CD25+  
505 regulatory T cells by TGF-beta induction of transcription factor Foxp3. *The Journal of*  
506 *experimental medicine* 198, 1875-1886.
- 507 Chen, Z., Barbi, J., Bu, S., Yang, H.Y., Li, Z., Gao, Y., Jinasena, D., Fu, J., Lin, F., Chen,  
508 C., *et al.* (2013). The ubiquitin ligase Stub1 negatively modulates regulatory T cell  
509 suppressive activity by promoting degradation of the transcription factor Foxp3.  
510 *Immunity* 39, 272-285.
- 511 Chinen, T., Kannan, A.K., Levine, A.G., Fan, X., Klein, U., Zheng, Y., Gasteiger, G.,  
512 Feng, Y., Fontenot, J.D., and Rudensky, A.Y. (2016). An essential role for the IL-2  
513 receptor in Treg cell function. *Nat Immunol* 17, 1322-1333.
- 514 Delgoffe, G.M., Kole, T.P., Zheng, Y., Zarek, P.E., Matthews, K.L., Xiao, B., Worley,  
515 P.F., Kozma, S.C., and Powell, J.D. (2009). The mTOR kinase differentially regulates  
516 effector and regulatory T cell lineage commitment. *Immunity* 30, 832-844.
- 517 Delgoffe, G.M., Woo, S.R., Turnis, M.E., Gravano, D.M., Guy, C., Overacre, A.E., Bettini,  
518 M.L., Vogel, P., Finkelstein, D., Bonnevier, J., *et al.* (2013). Stability and function of

- 519 regulatory T cells is maintained by a neuropilin-1-semaphorin-4a axis. *Nature* *501*, 252-  
520 256.
- 521 Dobin, A., Davis, C.A., Schlesinger, F., Drenkow, J., Zaleski, C., Jha, S., Batut, P.,  
522 Chaisson, M., and Gingeras, T.R. (2013). STAR: ultrafast universal RNA-seq aligner.  
523 *Bioinformatics* *29*, 15-21.
- 524 Doench, J.G., Fusi, N., Sullender, M., Hegde, M., Vaimberg, E.W., Donovan, K.F.,  
525 Smith, I., Tothova, Z., Wilen, C., Orchard, R., *et al.* (2016). Optimized sgRNA design to  
526 maximize activity and minimize off-target effects of CRISPR-Cas9. *Nat Biotechnol* *34*,  
527 184-191.
- 528 Feng, Y., Arvey, A., Chinen, T., van der Veecken, J., Gasteiger, G., and Rudensky, A.Y.  
529 (2014). Control of the inheritance of regulatory T cell identity by a cis element in the  
530 *Foxp3* locus. *Cell* *158*, 749-763.
- 531 Feuerer, M., Hill, J.A., Kretschmer, K., von Boehmer, H., Mathis, D., and Benoist, C.  
532 (2010). Genomic definition of multiple ex vivo regulatory T cell subphenotypes.  
533 *Proceedings of the National Academy of Sciences of the United States of America* *107*,  
534 5919-5924.
- 535 Fujita, T., and Fujii, H. (2014). Identification of proteins associated with an IFN $\gamma$ -  
536 responsive promoter by a retroviral expression system for enChIP using CRISPR. *PLoS*  
537 *one* *9*, e103084.
- 538 Gatchalian, J., Malik, S., Ho, J., Lee, D.S., Kelso, T.W.R., Shokhirev, M.N., Dixon, J.R.,  
539 and Hargreaves, D.C. (2018). A non-canonical BRD9-containing BAF chromatin  
540 remodeling complex regulates naive pluripotency in mouse embryonic stem cells.  
541 *Nature communications* *9*, 5139.
- 542 Gebuhr, T.C., Kovalev, G.I., Bultman, S., Godfrey, V., Su, L., and Magnuson, T. (2003).  
543 The role of Brg1, a catalytic subunit of mammalian chromatin-remodeling complexes, in  
544 T cell development. *The Journal of experimental medicine* *198*, 1937-1949.
- 545 Heinz, S., Benner, C., Spann, N., Bertolino, E., Lin, Y.C., Laslo, P., Cheng, J.X., Murre,  
546 C., Singh, H., and Glass, C.K. (2010). Simple combinations of lineage-determining  
547 transcription factors prime cis-regulatory elements required for macrophage and B cell  
548 identities. *Mol Cell* *38*, 576-589.
- 549 Helmlinger, D., and Tora, L. (2017). Sharing the SAGA. *Trends Biochem Sci* *42*, 850-  
550 861.
- 551 Hill, J.A., Feuerer, M., Tash, K., Haxhinasto, S., Perez, J., Melamed, R., Mathis, D., and  
552 Benoist, C. (2007). *Foxp3* transcription-factor-dependent and -independent regulation of  
553 the regulatory T cell transcriptional signature. *Immunity* *27*, 786-800.
- 554 Josefowicz, S.Z., Lu, L.F., and Rudensky, A.Y. (2012). Regulatory T cells: mechanisms  
555 of differentiation and function. *Annu Rev Immunol* *30*, 531-564.



- 556 Josefowicz, S.Z., Wilson, C.B., and Rudensky, A.Y. (2009). Cutting edge: TCR  
557 stimulation is sufficient for induction of Foxp3 expression in the absence of DNA  
558 methyltransferase 1. *Journal of immunology* *182*, 6648-6652.
- 559 Kim, H.P., and Leonard, W.J. (2007). CREB/ATF-dependent T cell receptor-induced  
560 FoxP3 gene expression: a role for DNA methylation. *The Journal of experimental*  
561 *medicine* *204*, 1543-1551.
- 562 Kitagawa, Y., Ohkura, N., Kidani, Y., Vandenbon, A., Hirota, K., Kawakami, R., Yasuda,  
563 K., Motooka, D., Nakamura, S., Kondo, M., *et al.* (2017). Guidance of regulatory T cell  
564 development by Satb1-dependent super-enhancer establishment. *Nat Immunol* *18*, 173-  
565 183.
- 566 Kitoh, A., Ono, M., Naoe, Y., Ohkura, N., Yamaguchi, T., Yaguchi, H., Kitabayashi, I.,  
567 Tsukada, T., Nomura, T., Miyachi, Y., *et al.* (2009). Indispensable role of the Runx1-  
568 Cbfbeta transcription complex for in vivo-suppressive function of FoxP3+ regulatory T  
569 cells. *Immunity* *31*, 609-620.
- 570 Koutelou, E., Hirsch, C.L., and Dent, S.Y. (2010). Multiple faces of the SAGA complex.  
571 *Curr Opin Cell Biol* *22*, 374-382.
- 572 Lal, G., Zhang, N., van der Touw, W., Ding, Y., Ju, W., Bottinger, E.P., Reid, S.P., Levy,  
573 D.E., and Bromberg, J.S. (2009). Epigenetic regulation of Foxp3 expression in  
574 regulatory T cells by DNA methylation. *Journal of immunology* *182*, 259-273.
- 575 Lee, H.M., Bautista, J.L., Scott-Browne, J., Mohan, J.F., and Hsieh, C.S. (2012). A  
576 broad range of self-reactivity drives thymic regulatory T cell selection to limit responses  
577 to self. *Immunity* *37*, 475-486.
- 578 Li, W., Koster, J., Xu, H., Chen, C.H., Xiao, T., Liu, J.S., Brown, M., and Liu, X.S. (2015).  
579 Quality control, modeling, and visualization of CRISPR screens with MAGeCK-VISPR.  
580 *Genome Biol* *16*, 281.
- 581 Li, W., Xu, H., Xiao, T., Cong, L., Love, M.I., Zhang, F., Irizarry, R.A., Liu, J.S., Brown,  
582 M., and Liu, X.S. (2014a). MAGeCK enables robust identification of essential genes  
583 from genome-scale CRISPR/Cas9 knockout screens. *Genome Biol* *15*, 554.
- 584 Li, X., Liang, Y., LeBlanc, M., Benner, C., and Zheng, Y. (2014b). Function of a Foxp3  
585 cis-element in protecting regulatory T cell identity. *Cell* *158*, 734-748.
- 586 Liston, A., Nutsch, K.M., Farr, A.G., Lund, J.M., Rasmussen, J.P., Koni, P.A., and  
587 Rudensky, A.Y. (2008). Differentiation of regulatory Foxp3+ T cells in the thymic cortex.  
588 *Proceedings of the National Academy of Sciences of the United States of America* *105*,  
589 11903-11908.
- 590 Liu, Y., Zhang, P., Li, J., Kulkarni, A.B., Perruche, S., and Chen, W. (2008). A critical  
591 function for TGF-beta signaling in the development of natural CD4+CD25+Foxp3+  
592 regulatory T cells. *Nat Immunol* *9*, 632-640.

- 593 Long, M., Park, S.G., Strickland, I., Hayden, M.S., and Ghosh, S. (2009). Nuclear factor-  
594 kappaB modulates regulatory T cell development by directly regulating expression of  
595 Foxp3 transcription factor. *Immunity* 31, 921-931.
- 596 Michel, B.C., D'Avino, A.R., Cassel, S.H., Mashtalir, N., McKenzie, Z.M., McBride, M.J.,  
597 Valencia, A.M., Zhou, Q., Bocker, M., Soares, L.M.M., *et al.* (2018). A non-canonical  
598 SWI/SNF complex is a synthetic lethal target in cancers driven by BAF complex  
599 perturbation. *Nature cell biology* 20, 1410-1420.
- 600 Mootha, V.K., Lindgren, C.M., Eriksson, K.F., Subramanian, A., Sihag, S., Lehar, J.,  
601 Puigserver, P., Carlsson, E., Ridderstrale, M., Laurila, E., *et al.* (2003). PGC-1alpha-  
602 responsive genes involved in oxidative phosphorylation are coordinately downregulated  
603 in human diabetes. *Nat Genet* 34, 267-273.
- 604 Ouyang, W., Beckett, O., Ma, Q., and Li, M.O. (2010). Transforming growth factor-beta  
605 signaling curbs thymic negative selection promoting regulatory T cell development.  
606 *Immunity* 32, 642-653.
- 607 Platt, R.J., Chen, S., Zhou, Y., Yim, M.J., Swiech, L., Kempton, H.R., Dahlman, J.E.,  
608 Parnas, O., Eisenhaure, T.M., Jovanovic, M., *et al.* (2014). CRISPR-Cas9 knockin mice  
609 for genome editing and cancer modeling. *Cell* 159, 440-455.
- 610 Polansky, J.K., Kretschmer, K., Freyer, J., Floess, S., Garbe, A., Baron, U., Olek, S.,  
611 Hamann, A., von Boehmer, H., and Huehn, J. (2008). DNA methylation controls Foxp3  
612 gene expression. *Eur J Immunol* 38, 1654-1663.
- 613 Remillard, D., Buckley, D.L., Paulk, J., Brien, G.L., Sonnett, M., Seo, H.S., Dastjerdi, S.,  
614 Wuhr, M., Dhe-Paganon, S., Armstrong, S.A., *et al.* (2017). Degradation of the BAF  
615 Complex Factor BRD9 by Heterobifunctional Ligands. *Angew Chem Int Ed Engl* 56,  
616 5738-5743.
- 617 Rudra, D., Egawa, T., Chong, M.M., Treuting, P., Littman, D.R., and Rudensky, A.Y.  
618 (2009). Runx-CBFbeta complexes control expression of the transcription factor Foxp3 in  
619 regulatory T cells. *Nat Immunol* 10, 1170-1177.
- 620 Sakaguchi, S., Yamaguchi, T., Nomura, T., and Ono, M. (2008). Regulatory T cells and  
621 immune tolerance. *Cell* 133, 775-787.
- 622 Samstein, R.M., Arvey, A., Josefowicz, S.Z., Peng, X., Reynolds, A., Sandstrom, R.,  
623 Neph, S., Sabo, P., Kim, J.M., Liao, W., *et al.* (2012). Foxp3 exploits a pre-existent  
624 enhancer landscape for regulatory T cell lineage specification. *Cell* 151, 153-166.
- 625 Sanjana, N.E., Shalem, O., and Zhang, F. (2014). Improved vectors and genome-wide  
626 libraries for CRISPR screening. *Nat Methods* 11, 783-784.
- 627 Shalem, O., Sanjana, N.E., Hartenian, E., Shi, X., Scott, D.A., Mikkelsen, T., Heckl, D.,  
628 Ebert, B.L., Root, D.E., Doench, J.G., *et al.* (2014). Genome-scale CRISPR-Cas9  
629 knockout screening in human cells. *Science* 343, 84-87.

- 630 Shifrut, E., Carnevale, J., Tobin, V., Roth, T.L., Woo, J.M., Bui, C.T., Li, P.J., Diolaiti,  
631 M.E., Ashworth, A., and Marson, A. (2018). Genome-wide CRISPR Screens in Primary  
632 Human T Cells Reveal Key Regulators of Immune Function. *Cell* 175, 1958-1971 e1915.
- 633 Spahn, P.N., Bath, T., Weiss, R.J., Kim, J., Esko, J.D., Lewis, N.E., and Harismendy, O.  
634 (2017). PinAPL-Py: A comprehensive web-application for the analysis of CRISPR/Cas9  
635 screens. *Scientific reports* 7, 15854.
- 636 Subramanian, A., Tamayo, P., Mootha, V.K., Mukherjee, S., Ebert, B.L., Gillette, M.A.,  
637 Paulovich, A., Pomeroy, S.L., Golub, T.R., Lander, E.S., *et al.* (2005). Gene set  
638 enrichment analysis: a knowledge-based approach for interpreting genome-wide  
639 expression profiles. *Proceedings of the National Academy of Sciences of the United*  
640 *States of America* 102, 15545-15550.
- 641 Sun, I.H., Oh, M.H., Zhao, L., Patel, C.H., Arwood, M.L., Xu, W., Tam, A.J., Blosser,  
642 R.L., Wen, J., and Powell, J.D. (2018). mTOR Complex 1 Signaling Regulates the  
643 Generation and Function of Central and Effector Foxp3(+) Regulatory T Cells. *Journal*  
644 *of immunology* 201, 481-492.
- 645 Tanaka, A., and Sakaguchi, S. (2017). Regulatory T cells in cancer immunotherapy.  
646 *Cell research* 27, 109-118.
- 647 Tone, Y., Furuuchi, K., Kojima, Y., Tykocinski, M.L., Greene, M.I., and Tone, M. (2008).  
648 Smad3 and NFAT cooperate to induce Foxp3 expression through its enhancer. *Nat*  
649 *Immunol* 9, 194-202.
- 650 van Loosdregt, J., and Coffey, P.J. (2014). Post-translational modification networks  
651 regulating FOXP3 function. *Trends Immunol* 35, 368-378.
- 652 van Loosdregt, J., Fleskens, V., Fu, J., Brenkman, A.B., Bekker, C.P., Pals, C.E.,  
653 Meerding, J., Berkens, C.R., Barbi, J., Grone, A., *et al.* (2013). Stabilization of the  
654 transcription factor Foxp3 by the deubiquitinase USP7 increases Treg-cell-suppressive  
655 capacity. *Immunity* 39, 259-271.
- 656 Wang, X., Wang, S., Troisi, E.C., Howard, T.P., Haswell, J.R., Wolf, B.K., Hawk, W.H.,  
657 Ramos, P., Oberlick, E.M., Tzvetkov, E.P., *et al.* (2019). BRD9 defines a SWI/SNF sub-  
658 complex and constitutes a specific vulnerability in malignant rhabdoid tumors. *Nature*  
659 *communications* 10, 1881.
- 660 Webster, K.E., Walters, S., Kohler, R.E., Mrkvan, T., Boyman, O., Surh, C.D., Grey,  
661 S.T., and Sprent, J. (2009). In vivo expansion of T reg cells with IL-2-mAb complexes:  
662 induction of resistance to EAE and long-term acceptance of islet allografts without  
663 immunosuppression. *The Journal of experimental medicine* 206, 751-760.
- 664 Xue, Y., Canman, J.C., Lee, C.S., Nie, Z., Yang, D., Moreno, G.T., Young, M.K.,  
665 Salmon, E.D., and Wang, W. (2000). The human SWI/SNF-B chromatin-remodeling  
666 complex is related to yeast rsc and localizes at kinetochores of mitotic chromosomes.

- 667 Proceedings of the National Academy of Sciences of the United States of America *97*,  
668 13015-13020.
- 669 Yan, Z., Cui, K., Murray, D.M., Ling, C., Xue, Y., Gerstein, A., Parsons, R., Zhao, K.,  
670 and Wang, W. (2005). PBAF chromatin-remodeling complex requires a novel specificity  
671 subunit, BAF200, to regulate expression of selective interferon-responsive genes.  
672 *Genes Dev* *19*, 1662-1667.
- 673 Yang, X.O., Nurieva, R., Martinez, G.J., Kang, H.S., Chung, Y., Pappu, B.P., Shah, B.,  
674 Chang, S.H., Schluns, K.S., Watowich, S.S., *et al.* (2008). Molecular antagonism and  
675 plasticity of regulatory and inflammatory T cell programs. *Immunity* *29*, 44-56.
- 676 Yue, Y., Liu, J., and He, C. (2015). RNA N6-methyladenosine methylation in post-  
677 transcriptional gene expression regulation. *Genes Dev* *29*, 1343-1355.
- 678 Zhao, K., Wang, W., Rando, O.J., Xue, Y., Swiderek, K., Kuo, A., and Crabtree, G.R.  
679 (1998). Rapid and phosphoinositol-dependent binding of the SWI/SNF-like BAF  
680 complex to chromatin after T lymphocyte receptor signaling. *Cell* *95*, 625-636.
- 681 Zheng, Y., Josefowicz, S., Chaudhry, A., Peng, X.P., Forbush, K., and Rudensky, A.Y.  
682 (2010). Role of conserved non-coding DNA elements in the Foxp3 gene in regulatory T-  
683 cell fate. *Nature* *463*, 808-812.
- 684 Zheng, Y., and Rudensky, A.Y. (2007). Foxp3 in control of the regulatory T cell lineage.  
685 *Nat Immunol* *8*, 457-462.
- 686 Zhou, Y., Zhou, B., Pache, L., Chang, M., Khodabakhshi, A.H., Tanaseichuk, O.,  
687 Benner, C., and Chanda, S.K. (2019). Metascape provides a biologist-oriented resource  
688 for the analysis of systems-level datasets. *Nature communications* *10*, 1523.
- 689

690 **Acknowledgments**

691 We would like to thank C. Gordon for mouse colony management, B. Kuo and X. Hu for  
692 assistance in plasmid extraction and mouse dissection, N. Hah and G. Chou for  
693 assistance in RNA-seq, ChIP-seq, CRISPR screen experiments, E. Shifrut and A.  
694 Marson (UCSF) for providing us the R script to generate the sgRNA distribution  
695 histograms, A. Williams and M. Shokhurov for bioinformatic assistance, and M. Downes  
696 and R. M. Evans for helpful discussion. C.S.L. was partly supported by the Albert G.  
697 and Olive H. Schlink Foundation. J.G. was supported by the Salk Institute T32 Cancer  
698 Training Grant T32CA009370 and the NIGMS NRSA F32 GM128377-01. D.C.H. was  
699 supported by the National Institutes of Health (GM128943-01, CA184043-03), the V  
700 Foundation for Cancer Research V2016-006, and the Leona M. and Harry B. Helmsley  
701 Charitable Trust. Y.Z. was supported by the NOMIS Foundation, the Crohn's and Colitis  
702 Foundation, the Leona M. and Harry B. Helmsley Charitable Trust, and National  
703 Institute of Health (AI107027 and OD023689). This work was also supported by  
704 National Cancer Institute funded Salk Institute Cancer core facilities (CA014195).

705

706 **Author Contributions**

707 Conceptualization: C.S.L., J.G., D.C.H. and Y.Z. Methodology: C.S.L. Investigation:  
708 C.S.L., J.G., Y.L., M.X., J.H., B.V. Resources: D.C.H. and Y.Z. Formal analysis: C.S.L.,  
709 J.G., M.L. Data Curation: C.S.L., J.G. Supervision: D.C.H. and Y.Z. Funding acquisition:  
710 D.C.H. and Y.Z. Writing – original draft preparation: C.S.L., J.G., D.C.H. and Y.Z.  
711 Writing – review and editing: C.S.L., J.G., D.C.H. and Y.Z.

712

713 **Figure Legends**

714 **Figure 1 | A genome-wide CRISPR screen in Treg cells**

715 **A**, Workflow of the CRISPR screen in Tregs. **B-D**, Validation of the CRISPR screen  
716 conditions. **B**, FACS plots showing *Foxp3* expression in Tregs after knocking out *Foxp3*  
717 (sg*Foxp3*), positive regulator *Cbfb* (sg*Cbfb*), and negative regulator *Dnmt1* (sg*Dnmt1*).  
718 Red and green gates were set based on *Foxp3* low 20% and high 20% in sgNT Treg,  
719 respectively. **C**, Mean fluorescence intensity (MFI) of *Foxp3* and **D**, Relative Log2FC of  
720 cell count comparing *Foxp3*<sup>Low</sup> to *Foxp3*<sup>High</sup> after deletion of the indicated target gene  
721 (n=3 per group). See also Figure S1 and S2.

722

723 **Figure 2 | Identification of novel *Foxp3* regulators in Treg cells**

724 **A, B**, A scatter plot of the Treg screen result showing positive regulators (A) and  
725 negative regulators (B). Genes that have met cutoff criteria (P-value<0.01, and  
726 Log2FC >± 0.5) are shown as red dots for positive regulators and green dots for  
727 negative regulators. **C**, Distribution of sgRNA Log2FC comparing *Foxp3*<sup>Low</sup> to *Foxp3*<sup>High</sup>.  
728 Red stripes represent sgRNAs from positive *Foxp3* regulators, whereas green stripes  
729 represent sgRNAs from negative *Foxp3* regulators. **D**, Venn diagram showing the  
730 overlap of *Foxp3* regulators with genes involved in cell contraction or expansion. **E, F**,  
731 Gene ontology analysis of positive *Foxp3* regulators (**E**) and negative *Foxp3* regulators  
732 (**F**). See also Figures S3 and S4; Tables S1, S2, S3, and S4.

733

734 **Figure 3 | The three SWI/SNF complex assemblies have distinct regulatory roles**  
735 **for *Foxp3* expression in Tregs**

736 **A**, A diagram showing three different variants of SWI/SNF complexes: BAF, ncBAF, and  
737 PBAF. BAF-specific subunits (ARID1A, DPF1-3) are colored blue, ncBAF-specific  
738 subunits (BRD9, SMARCD1, GLTSCR1L, GLTSCR1) colored orange, and PBAF-  
739 specific subunit (PBRM1, ARID2, BRD7, PHF10) colored green. Shared components  
740 among complexes are colored gray. Immunoprecipitation assay of ARID1A, BRD9, and  
741 PHF10, and BRG1 in Tregs. The co-precipitated proteins were probed for shared  
742 subunits (SMARCA4, SMARCC1, SMARCB1), BAF-specific ARID1A, ncBAF-specific  
743 BRD9, and PBAF-specific PBRM1. **B**, FACS histogram of Foxp3 expression in Tregs  
744 after sgRNA knockout of the indicated SWI/SNF subunits. **C**, Mean fluorescence  
745 intensity (MFI) of Foxp3 after sgRNA knockout of the indicated SWI/SNF subunits. Data  
746 represents mean and standard deviation of biological replicates (n = 3-21). **D**, Principal  
747 component analysis of RNA-seq data collected from Tregs transduced with guides  
748 against the indicated SWI/SNF subunits. In cases where two independent guides were  
749 used to knockdown a gene, the second guide for targeting gene indicated as “-2”. **E**,  
750 MFI of Foxp3 expression in Tregs after treatment with either DMSO or 0.16-10  $\mu$ M  
751 dBRD9 for 4 days. Data represent mean  $\pm$  s.d. Statistical analyses were performed  
752 using unpaired two-tailed Student's t test (ns:  $p \geq 0.05$ , \* $p < 0.05$ , \*\* $p < 0.01$ , \*\*\* $p < 0.001$ ,  
753 \*\*\*\* $p < 0.0001$ ).

754

755 **Figure 4 | BRD9 deletion reduces Foxp3 binding at CNS0, CNS2 enhancers and a**  
756 **subset of Foxp3 target sites**

757 **A**, Genome browser tracks of SMARCA4, BRD9, PHF10 ChIP-seq and ATAC-seq  
758 signal, as well as Foxp3 ChIP-seq in sgNT, sgFoxp3, sgBrd9 and sgPbrm1 Tregs and

759 Foxp3 in DMSO and dBRD9 treated Tregs (2.5  $\mu$ M dBRD9 for 4 days). *Foxp3* locus is  
760 shown with CNS0 and CNS2 enhancers indicated in gray ovals. **B**, Heat map of Foxp3,  
761 BRD9, SMARCA4, PHF10 ChIP-seq and ATAC-seq signal  $\pm$  3 kb centered on Foxp3-  
762 bound sites in Tregs, ranked according to Foxp3 read density. **C**, Venn diagram of the  
763 overlap between ChIP-seq peaks in Tregs for BRD9, Foxp3, and PHF10  
764 (hypergeometric p value of BRD9:Foxp3 overlap =  $e^{-30704}$ , hypergeometric p value of  
765 PHF10:Foxp3 overlap =  $e^{-13182}$ , hypergeometric p value of BRD9:PHF10 overlap =  $e^{-12895}$ ). **D**, Heat map of Foxp3 ChIP-seq signal in sgNT, sgFoxp3, sgBrd9 and sgPbrm1  
767 Tregs  $\pm$  3 kilobases (kb) centered on Foxp3-bound sites in sgNT, ranked according to  
768 read density. **E**, Venn diagram of the overlap (hypergeometric p value =  $e^{-11,653}$ )  
769 between sites that significantly lose Foxp3 binding (FC 1.5, Poisson p value < 0.0001) in  
770 sgFoxp3 and sgBrd9, overlaid on all Foxp3-bound sites in sgNT (in gray). **F**, Histogram  
771 of Foxp3 ChIP read density  $\pm$  1 kb surrounding the peak center of sites that significantly  
772 lose Foxp3 binding in both sgFoxp3 and sgBrd9 (n=1,699) in sgNT, sgFoxp3, sgBrd9  
773 and sgPbrm1. **G**, As in **E**, but for sites that lose H3K27ac (FC 1.5, Poisson p value <  
774 0.0001, hypergeometric p value of overlap =  $e^{-7,938}$ ). **H**, As in **F**, but for H3K27ac ChIP  
775 read density. **I**, As in **E**, but for sites that significantly lose Foxp3 binding in dBRD9  
776 treated Tregs versus DMSO (FC 1.5, Poisson p value < 0.0001). **J**, As in **F**, but for  
777 DMSO and dBRD9 treated cells.

778

779 **Figure 5 | BRD9 co-regulates the expression of Foxp3 and a subset of Foxp3**  
780 **target genes**



781 **A**, Volcano plot of log<sub>2</sub> fold change RNA expression in sgFoxp3/sgNT Tregs versus  
782 adjusted p value (Benjamin-Hochberg). Number of down- and up-regulated genes are  
783 indicated, which are colored blue and red, respectively. **B**, Significance of enrichment of  
784 Foxp3-dependent genes in each gene ontology. **C**, Pie chart of Foxp3 and BRD9  
785 binding by CHIP-seq for Foxp3-dependent genes. **D**, Scatterplot of the mRNA log<sub>2</sub> fold  
786 changes in sgFoxp3/sgNT and sgBrd9/sgNT for Foxp3-dependent genes. Linear  
787 regression analysis was performed to calculate the  $r^2$ . Best fit is represented as an  
788 orange dashed line. **E**, Gene set enrichment analysis (GSEA) enrichment plot for up-  
789 and down-regulated genes in sgBrd9/sgNT compared with RNA-seq data of genes that  
790 significantly change in sgFoxp3/sgNT Tregs. ES: Enrichment Score, NES: Normalized  
791 Enrichment Score, FWER: Familywise Error Rate. **F**, As in **E**, but for up- and down-  
792 regulated genes in dBRD9/DMSO Tregs. **G**, GSEA of the sgFoxp3/sgNT RNA-seq data;  
793 plot shows the familywise error rate (FWER) p value versus the normalized enrichment  
794 score (NES). See also Table S5.

795

796 **Figure 6 | The ncBAF complex regulates Treg suppressor function in vitro and in**  
797 **vivo.**

798 **A**. In vitro suppression assay of Tregs with sgRNA knockout of *Brd9*, *Smarcd1*, *Pbrm1*,  
799 and *Phf10* (n=3 per group, data represent  $\pm$  s.d.). sgNT was used as non-targeting  
800 control. **B-F**. Experiment to measure Treg function of sgNT or sgBrd9 knockout Treg  
801 cells relative to no Tregs in a T cell transfer induced colitis model. **B**, Experimental  
802 procedure. **C**, Body weight loss. **D**, Colon histology (left) and colitis scores (right). **E**,  
803 Percentage of Foxp3<sup>+</sup> cells in transferred CD45.2<sup>+</sup>CD4<sup>+</sup> Treg population at end point.

804 (n=4-6 per group. Data represent mean  $\pm$  s.e.m.) Statistical analyses were performed  
805 using unpaired two-tailed Student's t test (ns:  $p \geq 0.05$ , \* $p < 0.05$ , \*\* $p < 0.01$ , \*\*\* $p < 0.001$ ).

806

807 **Figure 7 | Targeting BRD9 in Treg improves anti-tumor immunity.**

808 **A**, Experiment procedure to measure function of sgNT or sgBrd9 knockout Treg cells  
809 relative to no Tregs in MC38 tumor model. **B**, Tumor growth curve. **C**, Tumor weight at  
810 end point. **D,E**, Bar graph of total CD4 T cells (**D**) and CD8 T cells (**E**) percentage in  
811 CD45+ immune cell population. **F,G**, Bar graph of IFN- $\gamma$ + cell percentage in CD4 T cells  
812 (**F**) and in CD8 T cells (**G**). **H**, Bar graph of CD4+eGFP+Foxp3+ donor cells in CD4+ T  
813 cells. **I**, Ratio of CD8/Treg. (n=5-7 per group. Data represent mean  $\pm$  s.e.m.) Statistical  
814 analyses were performed using unpaired two-tailed Student's t test (ns:  $p \geq 0.05$ , \* $p < 0.05$ ,  
815 \*\* $p < 0.01$ , \*\*\* $p < 0.001$ ).

816

817

818 **Methods**

819 **List of antibodies**

| <b>Target protein</b> | <b>Antibody source</b> | <b>Application (dilution)</b> |
|-----------------------|------------------------|-------------------------------|
| CD4-Alexa fluor 700   | eBioscience 56-0042-82 | Flow (1:400)                  |
| CD4-PerCP-Cy5.5       | TONBO 65-0042-U100     | Flow (1:400)                  |
| CD8-PE                | eBioscience 12-0081-85 | Flow (1:400)                  |
| CD8-BV510             | Biologend 100752       | Flow (1:400)                  |
| CD45.1-BV605          | Biologend 110735       | Flow (1:400)                  |
| CD45.2-Alexa 700      | Biologend 109822       | Flow (1:400)                  |
| Foxp3-eFluor 450      | eBioscience 48-5773-82 | Flow (1:400)                  |
| NGFR-PE               | Biologend 345106       | Flow (1:400)                  |
| NGFR-APC              | Biologend 345108       | Flow (1:400)                  |
| Thy1.1-PE             | eBioscience 12-0900-83 | Flow (1:400)                  |
| CD44-BV650            | Biologend 103049       | Flow (1:400)                  |
| CD62L-BV605           | Biologend 104438       | Flow (1:400)                  |
| IFN $\gamma$ -APC     | eBioscience 17-7311-82 | Flow (1:400)                  |
| Ghost Viability Dye   | TONBO 13-0865-T100     | Flow (1:800)                  |
| Foxp3                 | In-house               | WB (1:2000); ChIP (1:100)     |
| BRG1/SMARCA4          | Abcam 110641           | WB (1:2000); IP, ChIP (1:100) |
| BAF155/SMARCC1        | Santa Cruz sc-10756    | WB (1:1000)                   |
| BAF47/SMARCB1         | Santa Cruz sc-166165   | WB (1:1000)                   |
| BRD9                  | Active Motif 61537     | WB (1:2000); IP, ChIP (1:100) |
| PBRM1                 | Bethyl A301-591A       | WB (1:2000)                   |

|                       |                         |                  |
|-----------------------|-------------------------|------------------|
| PHF10                 | Thermo Fisher PA5-30678 | IP, ChIP (1:100) |
| ARID1A                | Santa Cruz sc-32761     | WB (1:1000)      |
| Histone H3K27ac       | Abcam ab4729            | ChIP (1:100)     |
| IgG                   | Cell Signaling 2729S    | IP (1:100)       |
| anti-mouse secondary  | Thermo Fisher A21058    | WB (1:20,000)    |
| anti-rabbit secondary | Thermo Fisher SA535571  | WB (1:20,000)    |

820

821 **List of sgRNA sequence**

| Plasmid name          | Target gene | sgRNA sequence        |
|-----------------------|-------------|-----------------------|
| pSIRG-NGFR-sgFoxp3    | Foxp3       | TCTACCCACAGGGATCAATG  |
| pSIRG-NGFR-sgCfbf     | Cfbf        | GCCTTGCCAGATTAAGTACAC |
| pSIRG-NGFR-sgDnmt1    | Dnmt1       | TAATGTGAACCGGTTACAG   |
| pSIRG-NGFR-sgArid1a   | Arid1a      | GCAGCTGCGAAGATATCGGG  |
| pSIRG-NGFR-sgArid1a-2 | Arid1a      | TACCCAAATATGAATCAAGG  |
| pSIRG-NGFR-sgArid1b   | Arid1b      | TGAGTGCAAACCTGAGCGCG  |
| pSIRG-NGFR-sgArid1b-2 | Arid1b      | CAGAACCCCAACATATAGCG  |
| pSIRG-NGFR-sgDpf1     | Dpf1        | TCTTCTACCTCGAGATCATG  |
| pSIRG-NGFR-sgDpf2     | Dpf2        | GAAGATACGCCAAAGCGTCG  |
| pSIRG-NGFR-sgPbrm1    | Pbrm1       | AAAACACTTGCATAACGATG  |
| pSIRG-NGFR-sgPbrm1-2  | Pbrm1       | CAATGCCAGGCACTACAATG  |
| pSIRG-NGFR-sgArid2    | Arid2       | ACTTGCAGTAAATTAGCTCG  |
| pSIRG-NGFR-sgBrd7     | Brd7        | CAGGAGGCAAGCTAACACGG  |
| pSIRG-NGFR-sgPhf10    | Phf10       | GTTGCCGACAGACCGAACGA  |

|                       |               |                       |
|-----------------------|---------------|-----------------------|
| pSIRG-NGFR-sgBrd9     | Brd9          | ATTAACCGGTTTCTCCCGGG  |
| pSIRG-NGFR-sgBrd9-2   | Brd9          | GGAACACTGCGACTCAGAGG  |
| pSIRG-NGFR-sgGltscr1  | Gltscr1       | GTTCTGTGTAAAATCACACT  |
| pSIRG-NGFR-sgGltscr1l | Gltscr1l      | ATGGCTTTATGCAACACGTG  |
| pSIRG-NGFR-sgSmarcd1  | Smarcd1       | CAATCCGGCTAAGTCGGACG  |
| pSIRG-NGFR-sgEny2     | Eny2          | AGAGCTAAATTAATTGAGTG  |
| pSIRG-NGFR-sgAtxn7l3  | Atxn7l3       | GCAGCCGAATCGCCAACCGT  |
| pSIRG-NGFR-sgUsp22    | Usp22         | GCCATCGACCTGATGTACGG  |
| pSIRG-NGFR-sgCcdc101  | Ccdc101/Sgf29 | CCAGGTTTCCCGATCCAGAG  |
| pSIRG-NGFR-sgTada3    | Tada3         | GAAGGTCTGTCCCCGCTACA  |
| pSIRG-NGFR-sgTada1    | Tada1         | TTTCCTTCTCGACACA ACTG |
| pSIRG-NGFR-sgTaf6l    | Taf6l         | TCATGAAACACACCAAACGA  |
| pSIRG-NGFR-sgSupt20   | Supt20        | TTAGTAGTCAATCTGTACCC  |
| pSIRG-NGFR-sgSupt5    | Supt5         | GATGACCGATGTACTCAAGG  |
| pSIRG-NGFR-sgNT       | Non-targeting | AAAAAGTCCGCGATTACGTC  |
| pSIRG-eGFP-sgBrd9     | Brd9          | ATTAACCGGTTTCTCCCGGG  |
| pSIRG-eGFP-sgNT       | Non-targeting | AAAAAGTCCGCGATTACGTC  |

822

## 823 Mice

824 C57BL/6 Rosa-Cas9/Foxp3<sup>Thy1.1</sup> mice were generated by crossing Rosa26-LSL-Cas9  
825 knockin mice(Platt et al., 2014) (The Jackson Laboratory #024857) with Foxp3<sup>Thy1.1</sup>  
826 reporter mice(Liston et al., 2008). Male Cas9/Foxp3<sup>Thy1.1</sup> mice at 8-12 weeks age were  
827 used to isolate Tregs for the CRISPR screen, and no gender preference was given for

828 other experiments. C57BL.6 Ly5.1+ congenic mice and Rag1<sup>-/-</sup> mice purchased from  
829 the Jackson Laboratory were used for Treg suppression assay and adoptive T cell  
830 transfer in colitis and tumor models. All mice were bred and housed in the specific  
831 pathogen-free facilities at the Salk Institute for Biological Studies and were conducted  
832 under the regulation of the Institutional Animal Care and Use Committee (IACUC) and  
833 institutional guidelines.

834

### 835 **Retroviral vectors and sgRNA library construction**

836 Self-inactivating retroviral vector pSIRG-NGFR was generated by modifying pSIR-  
837 dsRed-Express2(Fujita and Fujii, 2014) (Addgene #51135), which enables us to clone  
838 sgRNA as efficient as lentiCRISPRv2, to enrich transduced cells via magnetic beads  
839 isolation, and to perform intracellular staining without losing transduced reporter marker.  
840 We first mutated all BbsI sites in pSIR-dsRed-Express2, then inserted a sgRNA  
841 expressing cassette containing the U6 promoter, guide RNA scaffold and a 500bp filler  
842 embedded with BbsI cloning site. The dsRed cassette was replaced by cDNA sequence  
843 of human NGFR with truncated intracellular domain. We also generated pSIRG vector  
844 with eGFP (pSIRG-eGFP) for the purpose of T cells transfer in tumor study, minimizing  
845 potential immune rejection. The pSIRG-eGFP was generated by cutting pSIRG-NGFR  
846 with XcmI to remove NGFR cassette and replaced by eGFP cDNA by Gibson cloning.  
847 For cloning single guide RNA into the pSIRG vector, an annealed sgRNA oligos can be  
848 directly inserted into BbsI-digested pSIRG-NGFR by T4 ligation similar to the cloning  
849 method utilized by lentiCRISPRv2(Sanjana et al., 2014). To create a pooled sgRNA  
850 library in pSIRG-NGFR, we first amplified sgRNA sequences from an optimized mouse

851 CRISPR knockout library lentiCRISPRv2-Brie (Addgene #73632). A total of eight 50  $\mu$ L  
852 PCR reactions were performed to maximize coverage of sgRNA complexity. Each 50  $\mu$ L  
853 PCR reaction contained Q5 High-Fidelity DNA polymerase and buffer (NEB #M0491),  
854 15ng of lentiCRISPRv2-Brie, and targeted primers (Forward:  
855 GGCTTTATATATCTTGTGGAAAGGACGAAACACCG, Reverse:  
856 CTAGCCTTATTTAACTTGCTATTTCTAGCTCTAAAAC). PCR was performed at 98°C  
857 denature, 67°C annealing, 72°C extension for 12 cycles. The sgRNA library amplicons  
858 were then combined and separated in 2 % agarose gel, and purified by the QIAquick  
859 Gel Extraction Kit (Qiagen #28704). The purified sgRNA amplicons was inserted into  
860 the BbsI-digested pSIRG-NGFR by NEBuilder HIFI assembly (NEB #E2621S). The  
861 sgRNA representative of the retroviral CRISPR library (pSIRG-NGFR-Brie) was  
862 validated by deep sequencing and comparing to the original lentiCRISPRvs-Brie. The  
863 coverage of the new pSIRG-NGFR sgRNA library was evaluated by the PinAPL-Py  
864 program (Spahn et al., 2017) (see Extended Data Figure 1).

865

## 866 **T cell isolation and culture**

867 For large scale Treg culture, we first expanded Treg in Rosa-Cas9/Foxp3<sup>Thy1.1</sup> mice by  
868 injecting IL-2:IL-2 antibody immune complex according protocol described in Webster  
869 KE et. al(Webster et al., 2009). Spleen and lymph node Tregs were labeled with PE-  
870 conjugated Thy1.1 antibody and isolated by magnetic selection using anti-PE  
871 microbeads (Mitenyl #130-048-801). All isolated Tregs were activated by plate bound  
872 anti-CD3 and anti-CD28 antibodies and cultured with X-VIVO 20 media (LONZA #04-  
873 448Q) supplemented by 1X Pen/Strep, 1X Sodium pyruvate, 1X HEPES, 1X GlutaMax,

874 55  $\mu$ M beta-mercaptoethanol in the presence of IL-2 at 500 U/mL. For experiments with  
875 BRD9 degradation, Tregs were treated at day 0 with 2.5 $\mu$ M dBRD9 (Tocris #6606) and  
876 cultured for four days for RNA- and CHIP-seq and 0.16-10 $\mu$ M treated at day 0 and  
877 cultured dBRD9 for four days for Foxp3 MFI, cell viability and cell proliferation assays.  
878 Live cells were enriched by Ficoll-Paque 1.084 (GE Health 17-5446-02) for RNA-seq  
879 and CHIP-seq.

880

### 881 **Retroviral production and T cell transduction**

882 HEK293T cells were seeded in 6-wells plate at 0.5 million cells per 2mL DMEM media  
883 supplemented by 10% FBS, 1% Pen/Strep, 1X GlutaMax, 1X Sodium Pyruvate, 1X  
884 HEPES, and 55  $\mu$ M beta-mercaptoethanol. One day later, cells from each well was  
885 transfected with 1.2  $\mu$ g of targeting vector pSIRG-NGFR and 0.8  $\mu$ g of packaging vector  
886 pCL-Eco (Addgene, #12371) by using 4  $\mu$ L of FuGENE HD transfection reagent  
887 (Promega #E2311) according manufactured protocol. Cell culture media was replaced  
888 by 3 mL fresh DMEM complete media at 24 hours and 48 hours after transfection. The  
889 retroviral supernatant was collected at 48 and 72 hours post transfection for T cell  
890 infection. For experiments with CRISPR sgRNA targeted knockdown, Cas9+ Tregs  
891 were first seeded in 24-wells plate coated with CD3 and CD28 antibodies. At 24 hour  
892 post-activation, 70% of Treg media from each well was replaced by retroviral  
893 supernatant, supplemented with 4  $\mu$ g/mL Polybrene (Milipore # TR-1003-G), and spun  
894 in a benchtop centrifuge at 1,258 x g for 90 minutes at 32°C. After centrifugation, Treg  
895 media was replaced with fresh media supplemented with IL-2 and cultured for another  
896 three days. Transduced cells were analyzed for Foxp3 and cytokine expression in



897 eBioscience Fix/Perm buffer (eBioscience #00-5523-00) using flow cytometry.  
898 Transduced NGFR+ cells were FACS-sorted for subsequent RNA- and ChIP-seq  
899 experiments.

900

### 901 **Genome-wide CRISPR screen in Treg**

902 Approximately 360 million Treg cells isolated from Rosa-Cas9/Foxp3<sup>Thy1.1</sup> mice were  
903 used for the Treg screen. On day 0, Tregs were seeded at  $1 \times 10^6$  cells/mL into 24-wells  
904 plate coated with anti-CD3/28 and cultured with X-VIVO complete media with IL-2 (500  
905 U/ml). On day 1, sgRNA retroviral library transduction was performed with a MOI<0.2.  
906 On day 3, approximately 4 million (~50X coverage) NGFR+ transduced cells were  
907 collected in three replicates as the starting state sgRNA input. Treg cells reached  
908 confluence on day 4. NGFR+ transduced cells were isolated via magnetic selection by  
909 anti-PE beads (Mitenyl #130-048-801), and then plated onto new 24-wells plates coated  
910 with anti-CD3/CD28, and cultured in X-VIVO complete media with IL-2 (500 U/ml). On  
911 day 6, approximately 4 million NGFR+ transduced cells were collected in three  
912 replicates as the ending state sgRNA output. The remaining cells were fixed,  
913 permeabilized, and stained for intracellular Foxp3. Approximately 2 million Foxp3<sup>High</sup>  
914 (top 20%) and 2 million Foxp3<sup>Low</sup> (bottom 20%) cell populations were sorted in three  
915 replicates by a FACS Aria cell sorter for genomic DNA extraction and library  
916 construction.

917

### 918 **Preparation of sgRNA amplicons for Next-Generation Sequencing**

919 To extract genomic DNA, we first lysed cells with homemade digestion buffer (100mM  
920 NaCl, 10mM Tris, 25mM EDTA, 0.5% SDS, 0.1mg/mL Proteinase K) overnight in 50 °C.  
921 On the following day, the lysed sample was mixed with phenol: chloroform: isoamyl  
922 alcohol (25:24:1, v/v) in 1:1 ratio, and spun at 6000rpm for 15 min at room temperature.  
923 The supernatant containing genomic DNA was transferred into a new tube and mixed  
924 with twice volume of 100% ethanol, then spun at 12,500 rpm for 5 min in room  
925 temperature to precipitate DNA. Supernatant was removed, and the precipitated DNA  
926 was dissolved in ddH<sub>2</sub>O. DNA concentration was measured by Nanodrop. To generate  
927 sgRNA amplicons from extracted genomic DNA, we used a two-step PCR protocol  
928 which was adopted from the protocol published by *Shalem et. al.* (*Shalem et al., 2014*).  
929 We performed eight 50 µL PCR reactions containing 2 µg genomic DNA, NEB Q5  
930 polymerase, and buffer, and targeted primers (Forward:  
931 GGCTTTATATATCTTGTGGAAAGGACGAAACACCG, Reverse:  
932 CTAGCCTTATTTAACTTGCTATTTCTAGCTCTAAAAC). PCR was performed at 98°C  
933 denature, 70°C annealing, 15s extension for 20 cycles. The products from the first PCR  
934 were pooled together, and purified by AMPure XP SPRI beads according to  
935 manufacturer's protocol, and quantified by Qubit dsDNA HS assay. For the second  
936 round PCR, we performed eight 50 µL PCR reactions containing 2 ng purified 1<sup>st</sup> round  
937 PCR product, barcoded primer (see primer set from (*Shalem et al., 2014*), Priming site  
938 of reverse primer was changed to CTTCCCTCGACGAATTCCCAAC), NEB Q5  
939 polymerase, and buffer. PCR was performed at 98°C denature, 70°C annealing, 15 s  
940 extension for 12 cycles. The 2<sup>nd</sup> round PCR products were pooled, purified by AMPure

941 XP SPRI beads, quantified by Qubit dsDNA HS assay, and sequenced by NEXTSeq  
942 sequencer at single end 75 bp (SE75).

943

#### 944 **Data analysis of pooled CRISPR screen**

945 The screening hit identification and quality control was performed by MAGeCK-VISPR  
946 program(Li et al., 2015; Li et al., 2014a). The abundance of sgRNA from a sample fastq  
947 file was first quantified by MAGeCK “Count” module to generate a read count table. For  
948 hit calling, we used MAGeCK “test” module to generate a gene-ranking table that  
949 reporting RRA gene ranking score, p-value, and log2 fold change. The size factor for  
950 normalization was adjusted according to 1000 non-targeting control assigned in the  
951 screen library. All sgRNAs that are zero read were removed from RRA analysis. The  
952 log2 fold change of a gene was calculated from a mean of 4 sgRNA targeting per gene.  
953 The scatter plots showing the screen results were generated by using the R script  
954 EnhancedVolcano (<https://github.com/kevinblighe/EnhancedVolcano>). The R script that  
955 generated the sgRNA distribution histogram was provided by E. Shifrut and A. Marson  
956 (UCSF)(Shifrut et al., 2018). A gene list from Foxp3 regulators (either positive or  
957 negative) without affecting cell proliferation was subjected to Gene Ontology analysis  
958 using Metascape(Zhou et al., 2019). Genes were analyzed for enrichment for Functional  
959 Set, Pathway, and Structural Complex.

960

#### 961 **In vitro Treg suppression assay**

962 Tregs were transduced by retrovirus expressing sgRNA targeting gene of interest and  
963 cultured in X-VIVO complete media supplemented with IL-2 (500 U/ml). Four days after

964 transduction, transduced cells were sorted and mixed with FACS sorted CD45.1+ naive  
965 CD4 T cells (CD4<sup>+</sup> CD25<sup>-</sup> CD44<sup>Low</sup> CD62L<sup>High</sup>) labeled with CellTrace Violet (Thermo  
966 Fisher Scientific #C34571) in different ratio in the presence of irradiated T cell depleted  
967 spleen cells as antigen-presenting cells (APC). Three days later, Treg suppression  
968 function was measured by the percentage of non-dividing cells within the CD45.1<sup>+</sup>  
969 effector T cell population. For dBRD9 treatment experiment, dBRD9 was first dissolved  
970 in DMSO (10 mM stock) and added into Treg:Teff:APC mixture at 2.5 $\mu$ M. For Foxp3  
971 overexpression rescue experiment, Tregs were first transduced with sgNT or sgBrd9 at  
972 24 hour post-activation, and then transduced with MIGR empty vector or MIGR-Foxp3  
973 at 48 hour post-activation. Double transduced Tregs were FACS sorted on day 4 based  
974 on NGFR+ and GFP+ markers and then mixed with CellTrace labeled effector T cells in  
975 the presence of APC. Treg suppression readout was measured after three days of co-  
976 culture.

977

### 978 **Adoptive T cells transfer-induced colitis model**

979 Tregs were transduced by retrovirus expressing sgRNA targeting gene of interest, and  
980 cultured in X-VIVO complete media and IL-2 (500 U/ml). Four days after transduction,  
981 the NGFR+ transduced Treg cells were FACS sorted before transferred into recipient  
982 mice. To induce colitis, 2 million effector T cells (CD45.1<sup>+</sup> CD4<sup>+</sup> CD25<sup>-</sup> CD45RB<sup>High</sup>) and  
983 1 million sgRNA knockout Tregs (CD45.2<sup>+</sup> CD4<sup>+</sup> Thy1.1<sup>+</sup> NGFR<sup>+</sup>) were mixed together  
984 and transferred into Rag1 knockout recipient mice. The body weight of recipient mice  
985 was monitored weekly for signs of wasting symptoms. Mice were harvested 7 weeks

986 after T cell transfer. Spleens were used for profiling immune cell populations by FACS.

987 Colons were collected for histopathological analysis.

988

### 989 **Colon histopathological analysis**

990 Histopathological analysis was performed in a blinded manner and scored using the  
991 following criteria. Eight parameters were used that include (i) the degree of inflammatory  
992 infiltrate in the LP (0-3); (ii) Goblet cell loss (0–2); (iii) reactive epithelial  
993 hyperplasia/atypia with nuclear changes (0–3); (iv) the number of IELs in the epithelial  
994 crypts (0–3); (v) abnormal crypt architecture (distortion, branching, atrophy, crypt loss)  
995 (0–3); (vi) number of crypt abscesses (0–2); (vii) mucosal erosion to frank ulcerations  
996 (0–2) and (viii) submucosal spread to transmural involvement (0-2). The severity of  
997 lesion was scored independently in 3 regions (proximal, middle and distal colon) over a  
998 maximal score of 20. The overall colitis score was based as the average of each  
999 regional score (maximal score of 20).

1000

### 1001 **Adoptive T cells transfer and MC38 tumor model**

1002 Similar to the “Adoptive T cells transfer-induced colitis model”, Tregs were activated in  
1003 vitro and transduced with pSIRG-eGFP expressing sgNT or sgBrd9. Four days after  
1004 transduction, the eGFP+ transduced Treg were FACS sorted. Concurrently, Treg  
1005 depleted CD4 and CD8 T cells isolated from Rosa-Cas9/Foxp3<sup>Thy1.1</sup> mice were used as  
1006 effector T cells. A total of 1 million pSIRG-sgRNA transduced eGFP+ Tregs, 1 million  
1007 effector CD8 T cells, and 2 million Treg-depleted CD4 T cells were mixed and  
1008 transferred into Rag1 knockout recipient mice. on the following day, mice were

1009 implanted with 0.5 million MC38 cells (a gift from the laboratory of Dr. Susan Kaech) by  
1010 subcutaneous injection on the flank of mouse. When palpable tumor appeared, tumor  
1011 size was measured every two day by electronic calipers. At the end point, spleen and  
1012 tumor were collected for immune profiling. For tumor processing, tumor tissues were  
1013 minced into small pieces and digested with 0.5 mg/mL Collagenase IV (Sigma #C5138)  
1014 and DNAase I (Roche #4716728001) for 20 minutes and passed through 0.75  $\mu$ m cell  
1015 strainer to collect single cell suspension. Isolated cells were stimulated with  
1016 PMA/Ionomycin and Golgi plug for 5 hours, and then were subjected to Foxp3 and  
1017 cytokines staining with eBioscience Fix/Perm buffer (eBioscience #00-5523-00).

1018

#### 1019 **Nuclear protein extraction**

1020 Nuclear lysates were collected from Treg cells following a revised Dignam  
1021 protocol(Andrews and Faller, 1991). After cellular swelling in Buffer A (10 mM Hepes pH  
1022 7.9, 1.5 mM MgCl<sub>2</sub>, 10 mM KCl) supplemented with 1 mM DTT, 1 mM PMSF, 1  $\mu$ M  
1023 pepstatin, 10  $\mu$ M leupeptin and 10  $\mu$ M chymostatin, cells were lysed by homogenization  
1024 using a 21-gauge needle with six to eight strokes. If lysis remained incomplete, cells  
1025 were treated with 0.025 - 0.05% Igepal-630 for ten minutes on ice prior to nuclei  
1026 collection. Nuclei were spun down at 700 x g for five minutes then resuspended in  
1027 Buffer C (20 mM Hepes pH 7.9, 20% glycerol, 420 mM NaCl, 1.5 mM MgCl<sub>2</sub>, 0.2 mM  
1028 EDTA) supplemented with 1 mM DTT, 1 mM PMSF, 1  $\mu$ M pepstatin, 10  $\mu$ M leupeptin  
1029 and 10  $\mu$ M chymostatin. After thirty minutes of end-to-end rotation at 4°C, the sample  
1030 was clarified at 21,100 x g for ten minutes. Supernatant was collected, flash frozen in  
1031 liquid nitrogen and stored in the -80°C freezer.

1032

1033 **Co-Immunoprecipitation**

1034 Nuclear lysates were thawed on ice then diluted with two-thirds of original volume of 50  
1035 mM Tris-HCl pH 8, 0.3% NP-40, EDTA, MgCl<sub>2</sub> to bring down the NaCl concentration.  
1036 Proteins were quantified using Biorad DC Protein Assay (Cat #5000112) according to  
1037 manufacturer's instructions. For the co-IP reaction, 200-300 µg of proteins were  
1038 incubated with antibody against normal IgG, SMARCA4, BRD9, ARID1A or PHF10  
1039 overnight at 4°C, with end-to-end rotation. Precipitated proteins were bound to 50:50  
1040 Protein A: Protein G Dynabeads (Invitrogen) for one to two hours and washed  
1041 extensively with IP wash buffer (50 mM Tris pH 8, 150 mM NaCl, 1 mM EDTA, 10%  
1042 glycerol, 0.5% Triton X100). Proteins were eluted in SDS-PAGE loading solution with  
1043 boiling for five minutes and analyzed by western blotting.

1044

1045 **Western blot**

1046 Protein samples were run on 4-12% Bis-Tris gels (Life Technologies). After primary  
1047 antibody incubation which is typically done overnight at 4°C, blots were probed with  
1048 1:20,000 dilution of fluorescently-labeled secondary antibodies in 2% BSA in PBST (1X  
1049 Phospho-buffered saline with 0.1% Tween-20) for an hour at room temperature (RT).  
1050 Fluorescent images were developed using Odyssey and analyzed using Image Studio 2.  
1051 Protein quantitation was performed by first normalizing the measured fluorescence  
1052 values of the proteins of interest against the loading control (TBP) then normalizing  
1053 against the control sample (vehicle treated).

1054

1055 **RNA-seq sample preparation**

1056 RNA from  $1-3 \times 10^6$  cells was extracted and purified with TRIzol reagent (Thermo Fisher)  
1057 according to manufacturer's instructions. RNA-seq libraries were prepared using  
1058 Illumina TruSeq Stranded mRNA kit following manufacturer's instructions with 5  $\mu$ g of  
1059 input RNA.

1060

1061 **RNA-seq analysis**

1062 Single-end 50 bp reads were aligned to the mouse genome mm10 using STAR  
1063 alignment tool (V2.5)(Dobin et al., 2013). RNA expression was quantified as raw integer  
1064 counts using analyzeRepeats.pl in HOMER(Heinz et al., 2010) using the following  
1065 parameters: -strand both -count exons -condenseGenes -noadj. To identify differentially  
1066 expressed genes, we performed getDiffExpression.pl in HOMER, which uses the  
1067 DESeq2 R package to calculate the biological variation within replicates. Cut-offs were  
1068 set at  $\log_2$  FC = 0.585 and FDR at 0.05 (Benjamin-Hochberg). Principal Component  
1069 Analysis (PCA) was performed with the mean of transcript per million (TPM) values  
1070 using Cluster 3.0 with the following filter parameters: at least one observation with  
1071 absolute value equal or greater than two and gene vector of four. TPM values were log  
1072 transformed then centered on the mean.

1073

1074 **Gene Set Enrichment Analysis**

1075 GSEA software(Mootha et al., 2003; Subramanian et al., 2005) was used to perform the  
1076 analyses with the following parameters: number of permutations = 1000; enrichment  
1077 statistic = weighted; and metric for ranking of genes = difference of classes (Input RNA-



1078 seq data was log-transformed). For Figure 5G, input RNA-seq data contained the  
1079 normalized log-transformed reads of the 1,325 differentially expressed genes (DEGs) in  
1080 sgFoxp3/sgNT Tregs. The compiled gene list included GSEA Gene Ontology,  
1081 Immunological Signature, Curated Gene, and the up- and down-regulated DEGs in  
1082 sgBrd9/sgNT Tregs. The resulting normalized enrichment scores and FWER p values  
1083 were combined to generate the graph.

1084

### 1085 **ChIP-seq sample preparation**

1086 Treg cells were collected and cross-linked first in 3 mM disuccinimidyl glutarate (DSG)  
1087 in 1X PBS for thirty minutes then in 1% formaldehyde for another ten minutes, both at  
1088 RT, for chromatin binding protein ChIP or in 1% formaldehyde only for histone  
1089 modification ChIP. After quenching the excess cross-linker with a final concentration of  
1090 125 mM glycine, the cells were washed in 1X PBS, pelleted, flash-frozen in liquid  
1091 nitrogen, and stored at -80°C. Cell pellets were thawed on ice and incubated in lysis  
1092 solution (50 mM HEPES-KOH pH 8, 140 mM NaCl, 1 mM EDTA, 10% glycerol, 0.5%  
1093 NP40, 0.25% Triton X-100) for ten minutes. The isolated nuclei were washed with wash  
1094 solution (10 mM Tris-HCl pH 8, 1 mM EDTA, 0.5 mM EGTA, 200 mM NaCl) and  
1095 shearing buffer (0.1% SDS, 1 mM EDTA, 10 mM Tris-HCl pH 8) then sheared in a  
1096 Covaris E229 sonicator for ten minutes to generate DNA fragments between ~ 200-  
1097 1000 base pairs (bp). After clarification of insoluble material by centrifugation, the  
1098 chromatin was immunoprecipitated overnight at 4°C with antibodies against Foxp3,  
1099 SMARCA4, BRD9, PHF10 or H3K27ac. The next day, the antibody bound DNA was  
1100 incubated with Protein A+G Dynabeads (Invitrogen) in ChIP buffer (50 mM HEPES-

1101 KOH pH 7.5, 300 mM NaCl, 1 mM EDTA, 1% Triton X-100, 0.1% DOC, 0.1% SDS),  
1102 washed and treated with Proteinase K and RNase A. Cross-linking was reversed by  
1103 incubation at 55°C for two and a half hours. Purified ChIP DNA was used for library  
1104 generation (NuGen Ovation Ultralow Library System V2) according to manufacturer's  
1105 instructions for subsequent sequencing.

1106

### 1107 **ChIP-seq analysis**

1108 Single-end 50 bp or paired-end 42 bp reads were aligned to mouse genome mm10  
1109 using STAR alignment tool (V2.5)(Dobin et al., 2013). ChIP-Seq peaks were called  
1110 using findPeaks within HOMER using parameters for histone (-style histone) or  
1111 transcription factor (-style factor) (Christopher Benner, HOMER,  
1112 <http://homer.ucsd.edu/homer/index.html>, 2018). Peaks were called when enriched > two-  
1113 fold over input and > four-fold over local tag counts, with FDR 0.001 (Benjamin-  
1114 Hochberg). For histone ChIP, peaks within a 1000 bp range were stitched together to  
1115 form regions. ChIP-Seq peaks or regions were annotated by mapping to the nearest  
1116 TSS using the annotatePeaks.pl command. Differential ChIP peaks were found by  
1117 merging peaks from control and experiment groups and called using  
1118 getDiffExpression.pl with fold change  $\geq 1.5$  or  $\leq -1.5$ , Poisson p value  $< 0.0001$ .

1119

### 1120 **Motif analysis**

1121 Sequences within 200 bp of peak centers were compared to motifs in the HOMER  
1122 database using the findMotifsGenome.pl command using default fragment size and  
1123 motif length parameters. Random GC content-matched genomic regions were used as

1124 background. Enriched motifs are statistically significant motifs in input over background  
1125 by a p-value of less than 0.05. P-values were calculated using cumulative binomial  
1126 distribution.

1127

### 1128 **ATAC-seq sample preparation**

1129 ATAC-seq was performed according to previously published protocol(Buenrostro et al.,  
1130 2013). Briefly, 50,000 Treg cells were collected in duplicates and washed first with cold  
1131 1X PBS then with Resuspension buffer (RSB; 10 mM Tris-HCl pH 7.4, 10 mM NaCl, 3  
1132 mM MgCl<sub>2</sub>). Cells were lysed in RSB supplemented with 0.1% Igepal-630 and nuclei  
1133 were isolated by centrifugation at 500 x g for ten minutes. Nuclei were incubated with  
1134 Tn5 transposase in Tagment Buffer (Illumina) for thirty minutes at 37°C. Purified DNA  
1135 was ligated with adapters, amplified and size selected using AMPure XP beads  
1136 (Beckman) for sequencing. Library DNA was sequenced using paired end 42 bp reads.

1137

### 1138 **ATAC-seq analysis**

1139 Paired end 42 bp reads were aligned to mouse genome mm10 using STAR alignment  
1140 tool (V2.5). ATAC-seq peaks were called using findPeaks within HOMER using the style  
1141 parameter dnase. Peaks were called when enriched > four-fold over genomic  
1142 background and > four-fold over local tag counts, with FDR 0.001 (Benjamin-Hochberg).

1143

## Loo, et al. Figure 1

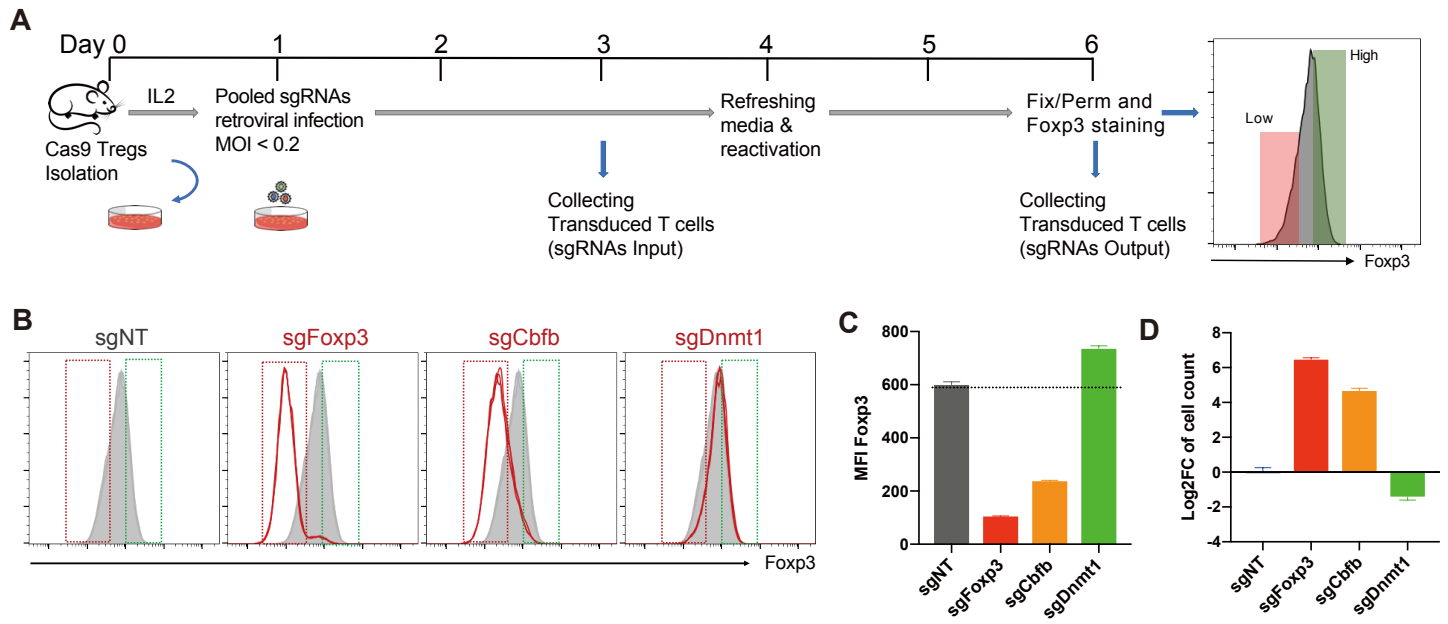

Loo, et al. Figure 2

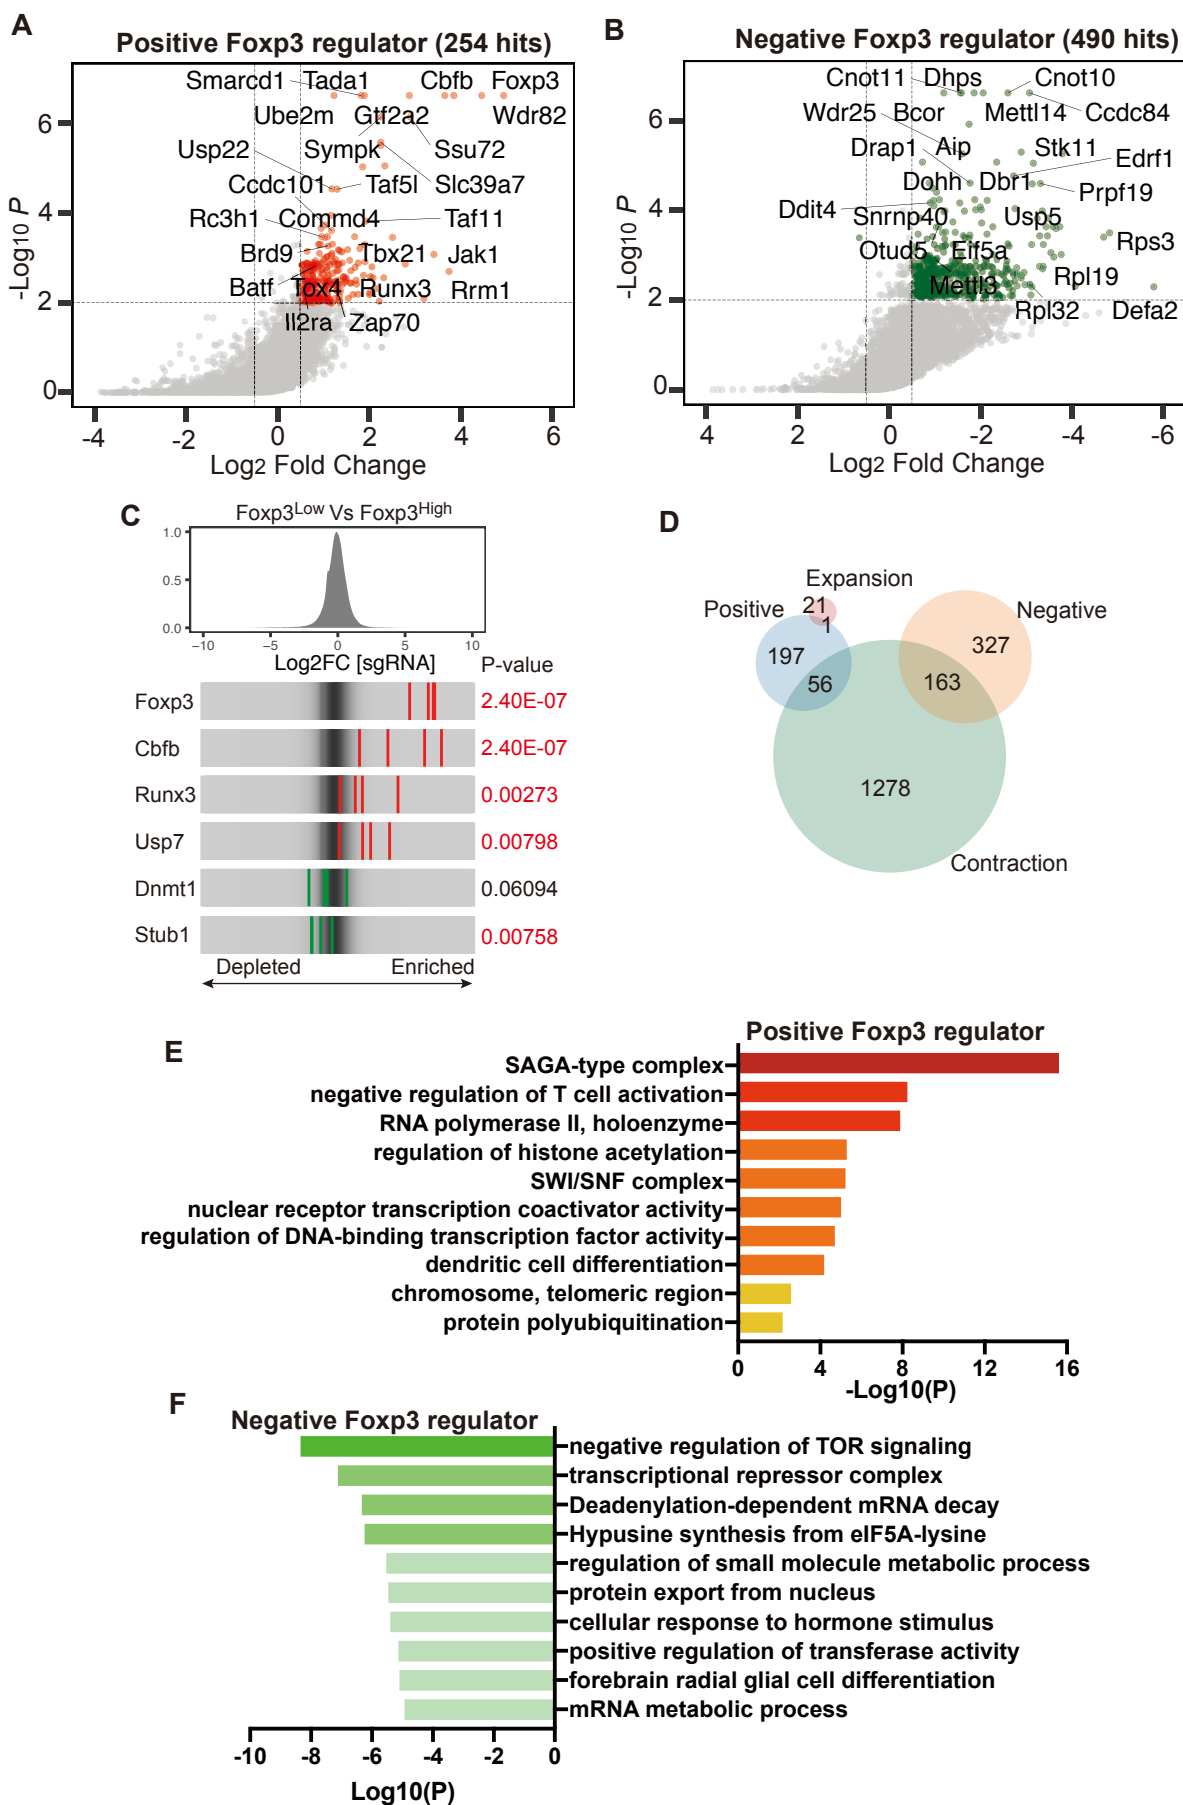

Loo, et al. Figure 3

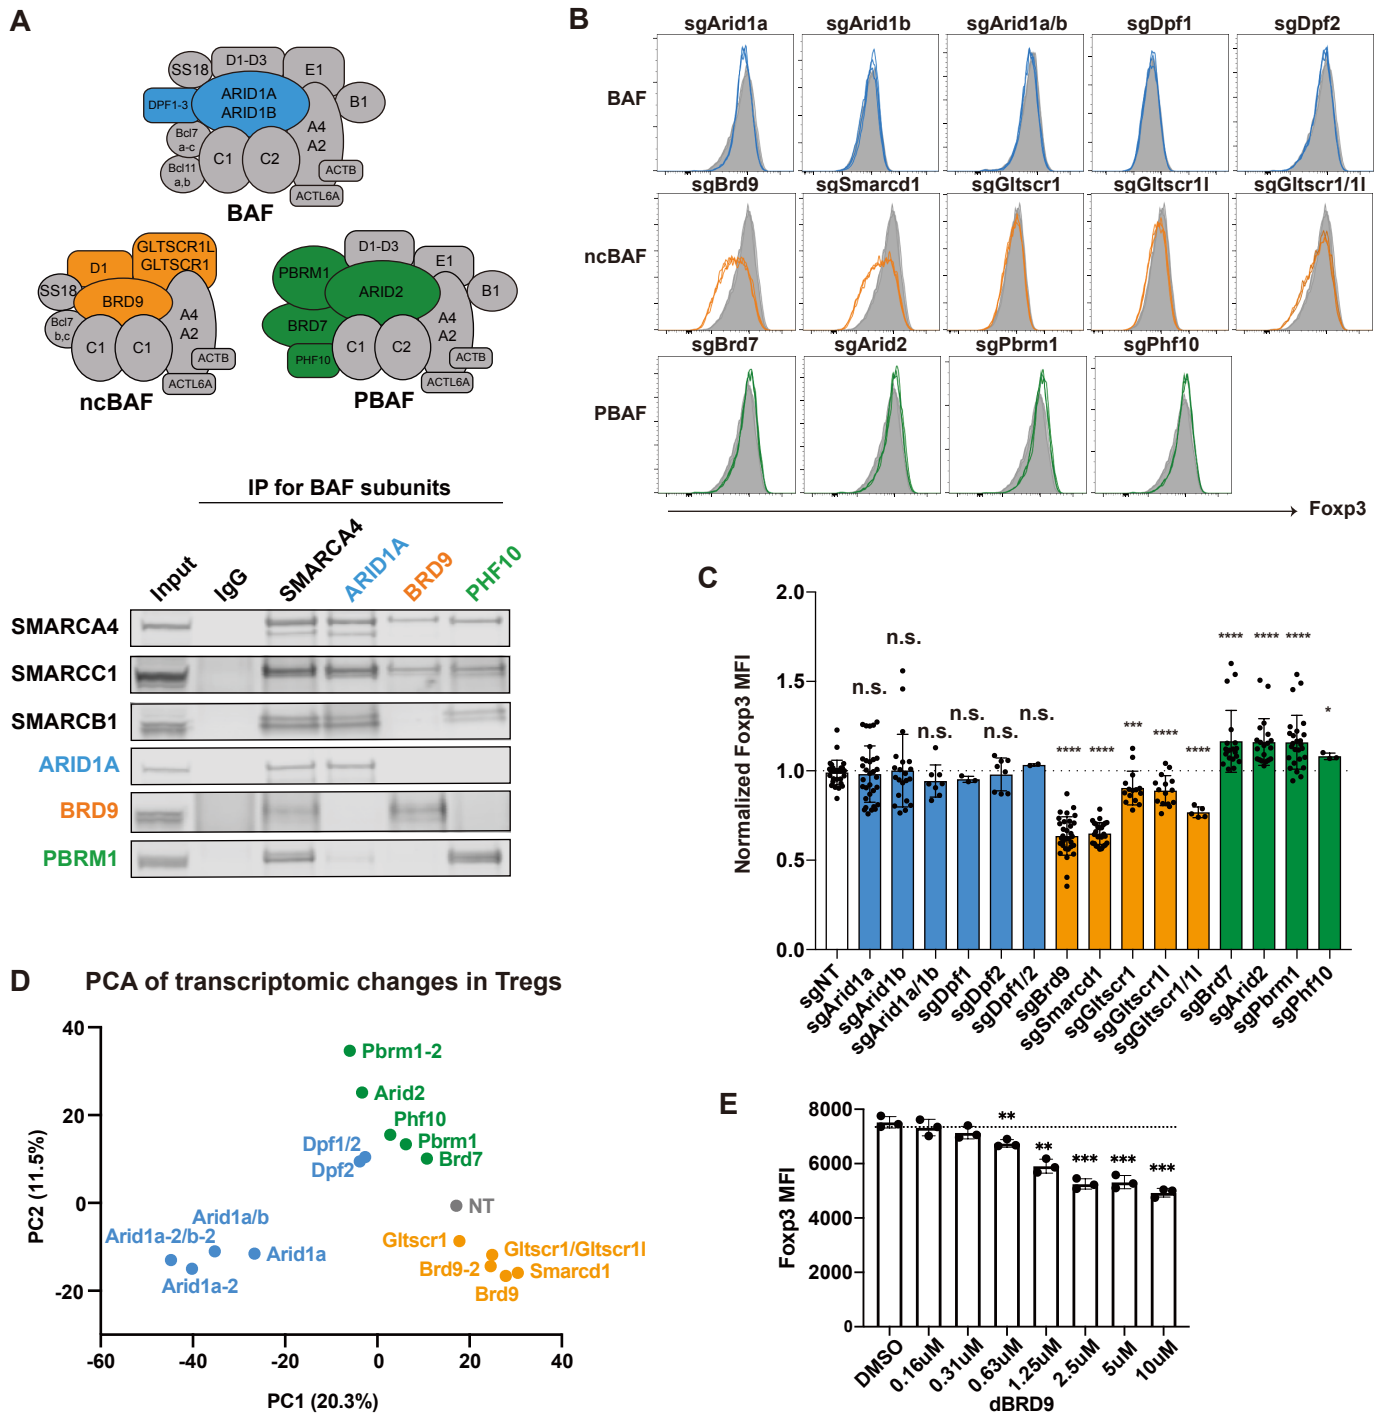

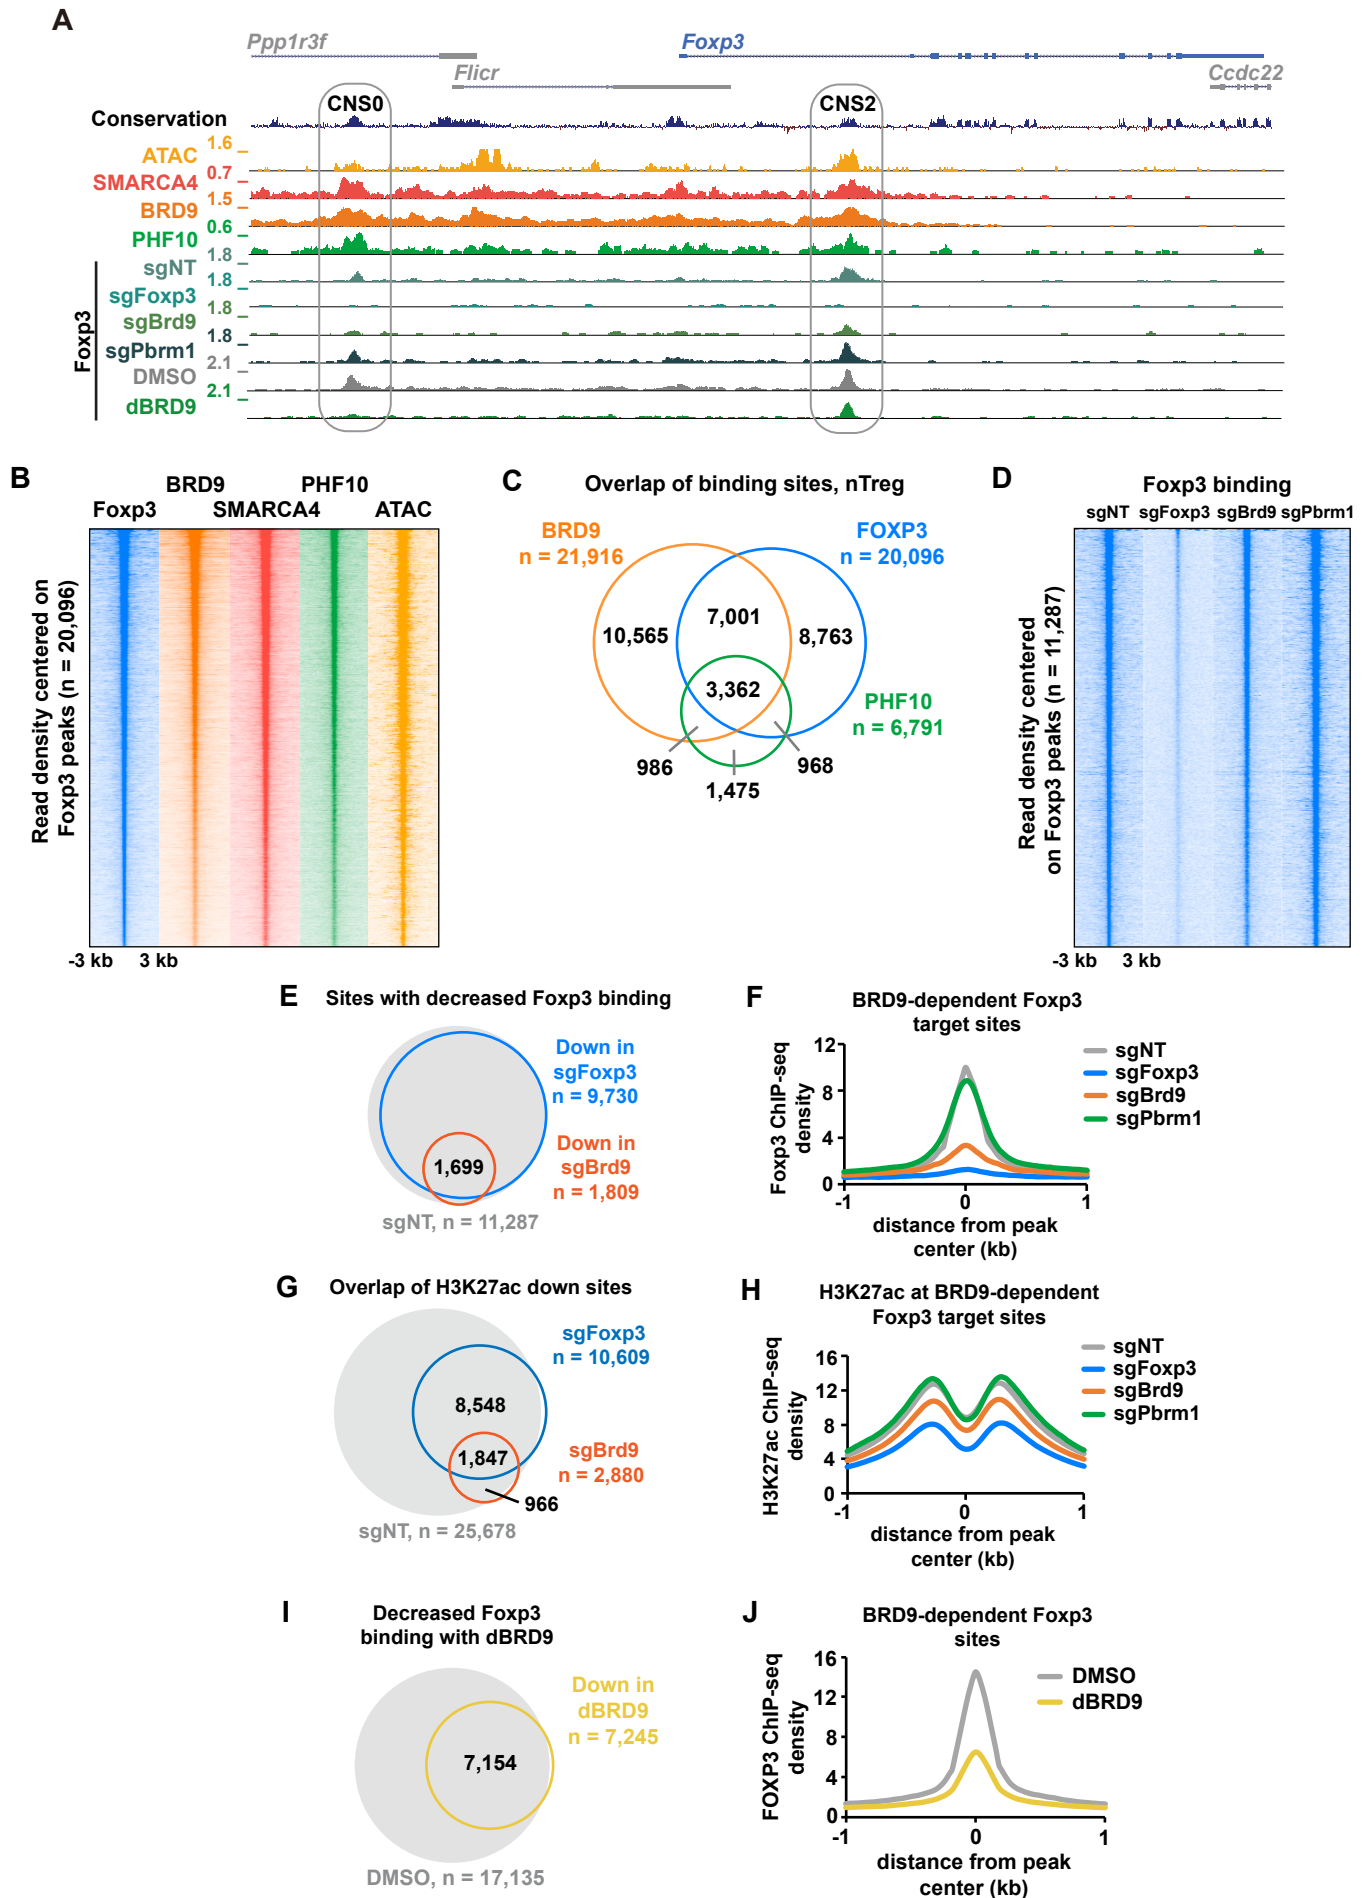

Loo, et al. Figure 5

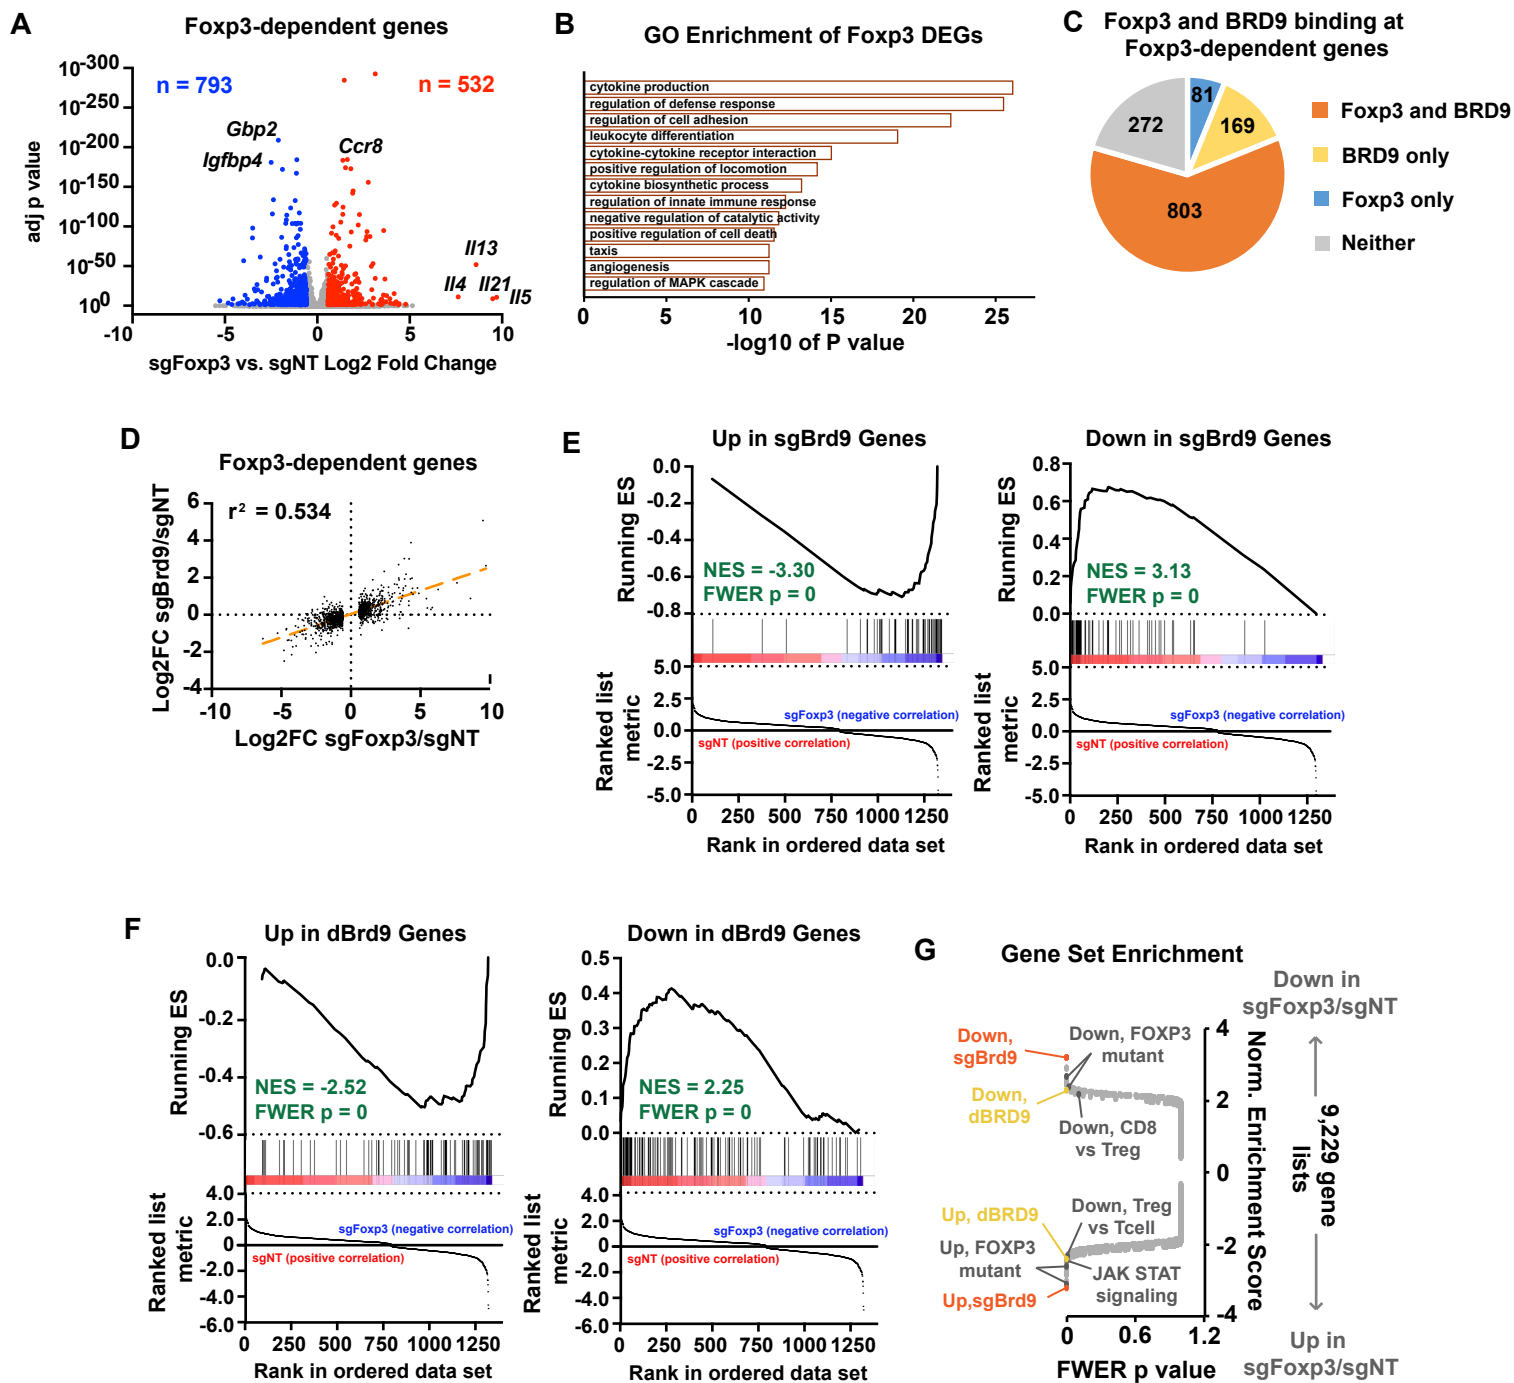



Loo, et al. Figure 6

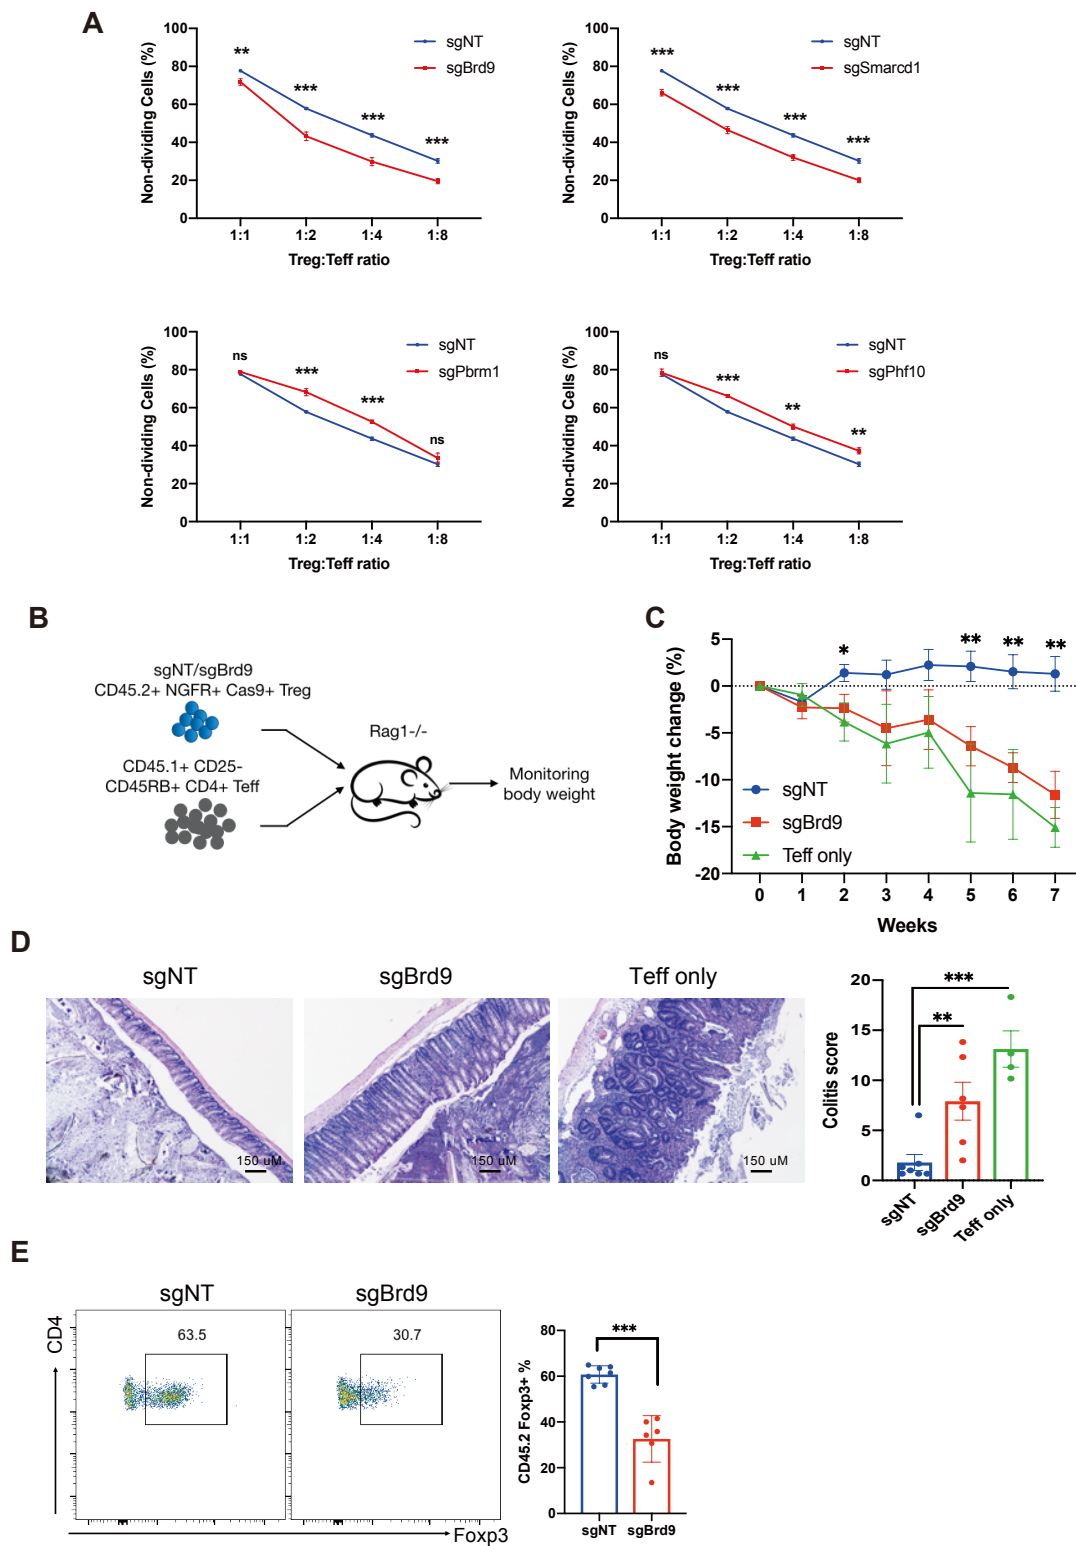

Loo, et al. Figure 7

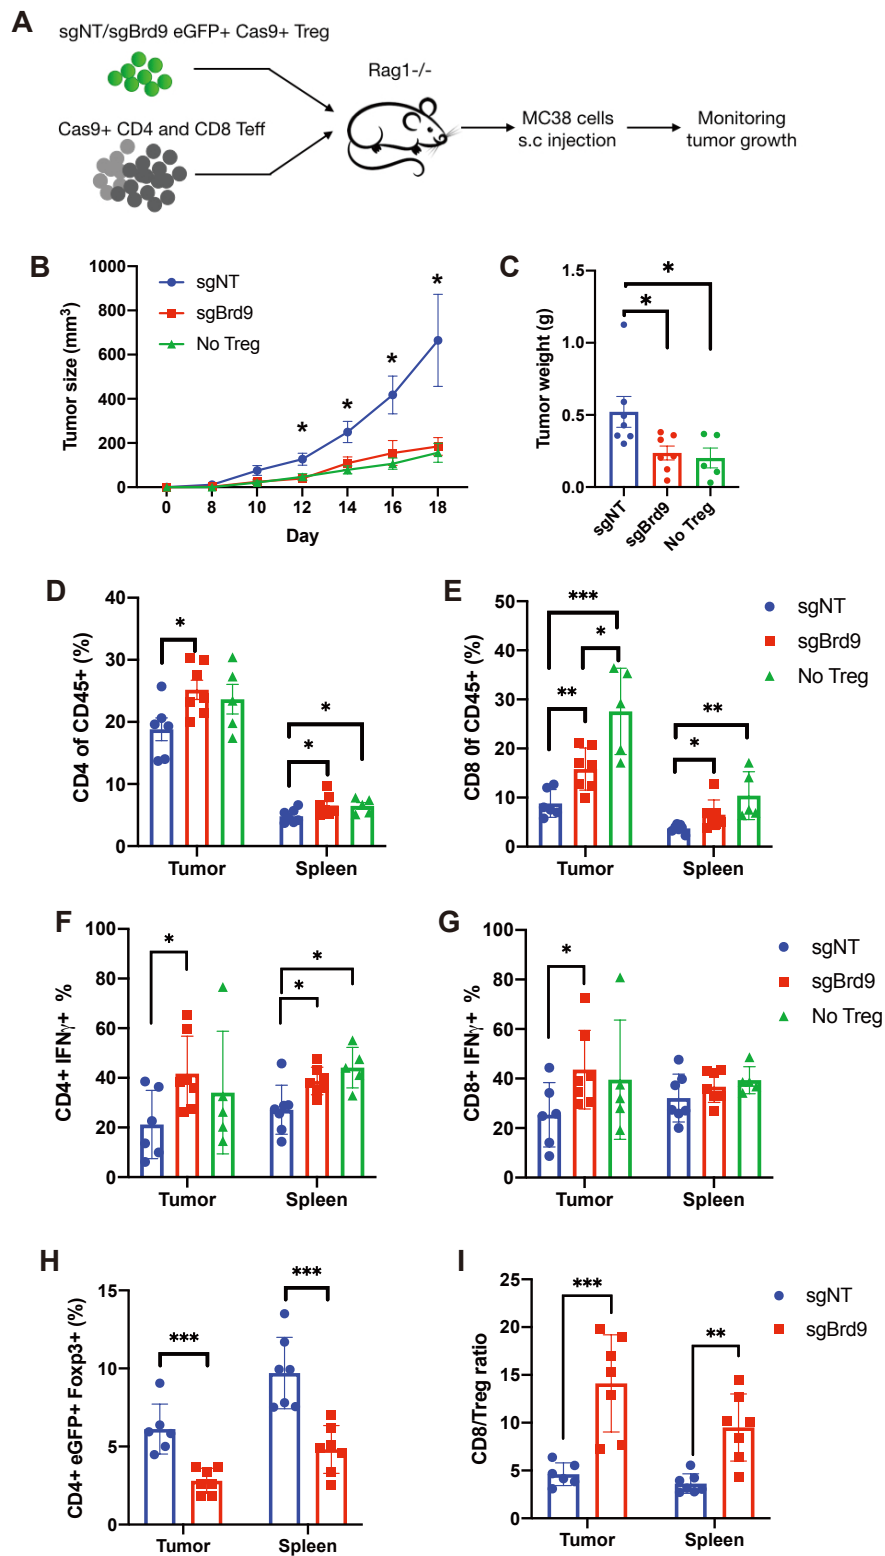

Source: https://www.biorxiv.org/content/10.1101/2020.02.26.964981v1.full.pdf
